# Supplementary material for: Interim analyses from a randomised controlled trial to improve visual processing speed in older adults: the Iowa Healthy and Active Minds Study
Source: PubMed Central journal article supplement — BMJ Open. 2011 Nov 21;1(2):e000225. doi: 10.1136/bmjopen-2011-000225 (PMC3225585; doi:10.1136/bmjopen-2011-000225), 2011-11-21
Supplement: bmjopen-2011-000225.draft_revisions.pdf [file bmjopen-2011-000225.draft_revisions.pdf]

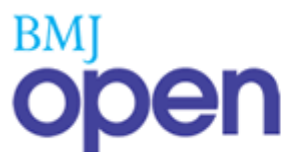

**Post-training results from a randomized controlled trial to improve cognitive functioning in older adults: the Iowa Healthy and Active Minds Study**

|                                 |                                                                                                                                                                                                                                                                                                                                                                                                                                                                                                                                         |
|---------------------------------|-----------------------------------------------------------------------------------------------------------------------------------------------------------------------------------------------------------------------------------------------------------------------------------------------------------------------------------------------------------------------------------------------------------------------------------------------------------------------------------------------------------------------------------------|
| Journal:                        | <i>BMJ Open</i>                                                                                                                                                                                                                                                                                                                                                                                                                                                                                                                         |
| Manuscript ID:                  | bmjopen-2011-000225                                                                                                                                                                                                                                                                                                                                                                                                                                                                                                                     |
| Article Type:                   | Research                                                                                                                                                                                                                                                                                                                                                                                                                                                                                                                                |
| Date Submitted by the Author:   | 17-Jun-2011                                                                                                                                                                                                                                                                                                                                                                                                                                                                                                                             |
| Complete List of Authors:       | Wolinsky, Fredric; University of Iowa, Health Management and Policy<br>Vander Weg, Mark; University of Iowa, Medicine<br>Howren, Matthew; University of Iowa, Medicine<br>Jones, Michael; University of Iowa, Biostatistics<br>Martin, Rene; University of Iowa, Nursing<br>Luger, Tana; University of Iowa, Psychology<br>Duff, Kevin; University of Utah, Neurology<br>Goerdts, Chris; University of Iowa, Medicine<br>Wolfe, Steven; University of Iowa, Medicine<br>Dotson, Megan; University of Iowa, Health Management and Policy |
| <b>Primary Subject Heading</b>: | Geriatric medicine                                                                                                                                                                                                                                                                                                                                                                                                                                                                                                                      |
| Keywords:                       | GERIATRIC MEDICINE, Old age psychiatry < PSYCHIATRY, PUBLIC HEALTH, Clinical trials < THERAPEUTICS                                                                                                                                                                                                                                                                                                                                                                                                                                      |
|                                 |                                                                                                                                                                                                                                                                                                                                                                                                                                                                                                                                         |

SCHOLARONE™  
Manuscripts

1  
2  
3 **Post-training results from a randomized controlled trial to improve cognitive**  
4  
5 **functioning in older adults:the Iowa Healthy and Active Minds Study**  
6  
7  
8  
9  
10  
11  
12  
13  
14  
15  
16  
17  
18  
19  
20  
21  
22  
23  
24  
25  
26  
27  
28  
29  
30  
31  
32  
33  
34  
35  
36  
37  
38  
39  
40  
41  
42  
43  
44  
45  
46  
47  
48  
49  
50  
51  
52  
53  
54

Fredric D. Wolinsky  
Mark W. Vander Weg  
M. Bryant Howren  
Michael P. Jones  
Rene Martin  
Tana M. Luger  
Kevin Duff  
Christopher Goerd  
Steven Wolfe  
Megan M. Dotson

Prepared for Submission to *BMJ Open*  
Words in Abstract: 283  
Words in Text:3,346  
References: 36  
Figures: 2  
Tables: 3

50 June 16, 2011

55 Running Head: Post-training results from the IHAMS trial  
56  
57  
58  
59  
60

## Abstract

**Objectives:** The Iowa Healthy and Active Minds Study (IHAMS) is a four-arm, randomized controlled trial of a visual processing speed training program known as *Road Tour*. This article reports the post-training (6-8 weeks after randomization) results for the primary outcome.

**Design:** Within two age strata (50-64 vs.  $\geq 65$ ), 681 men and women attending general internal and family medicine clinics were randomized to four treatment groups: (1) a supervised, on-site, standard (10-hour) dose of *Road Tour* training; (2) a supervised, on-site, standard dose of *Road Tour* training with subsequent booster training; (3) a supervised, on-site, standard dose of attention control training using computerized crossword puzzles; and, (4) a self-administered, at-home, standard dose of *Road Tour* training. The primary outcome was the Useful Field of View (UFOV) PC mouse version. Intent-to-treat multiple logistic regression analyses of post-training improvements  $\geq 100$  milliseconds (0.55 standard deviations) in the UFOV test was conducted among the 616 participants (90.4%) with complete baseline and post-training data.

**Results:** In pooled analyses of both age strata, random assignment to any *Road Tour* training group vs. the attention control group was statistically significant ( $p < .001$ ), with an odds ratio (adjusted for the UFOV test at randomization) of 4.85 ( $CI_{95\%} = 2.60 - 9.05$ ; AUC = 0.92). Similar results were obtained for each *Road Tour* group and within each age-stratum.

**Conclusion:** A 10-hour dose of *Road Tour* training resulted in clinically and statistically significant post-training improvements in visual processing speed. *Road Tour* appeared to be equally effective regardless of whether it was administered under laboratory

1  
2  
3 supervision or self-administered in the patient's home. *Road Tour* was also equally  
4  
5 effective among participants in both age strata (50-64 vs.  $\geq 65$ ).  
6  
7

8 Clinical Trial Registration Number: NCT01165463.  
9  
10  
11  
12  
13  
14  
15  
16  
17  
18  
19  
20  
21  
22  
23  
24  
25  
26  
27  
28  
29  
30  
31  
32  
33  
34  
35  
36  
37  
38  
39  
40  
41  
42  
43  
44  
45  
46  
47  
48  
49  
50  
51  
52  
53  
54  
55  
56  
57  
58  
59  
60

For peer review only

## Article Summary

### Article Focus:

- Because age-related declines in cognitive functioning are a part of the normal aging process, there is a pressing need to identify efficient and effective training interventions that improve cognitive functioning in older adults.
- This article reports the post-training results of the IHAMS four-arm RCT of three modes (supervised on-site without booster training, supervised on-site with booster training, and self-administered at-home use) of delivering a computerized visual speed of processing intervention vs. an attention control group (supervised on-site computerized crossword puzzles without booster training).

### Key Messages:

- IHAMS is the first RCT to evaluate the efficacy and effectiveness of *Road Tour*, a second-generation computerized visual speed of processing intervention.
- The results demonstrate clinically and statistically significant post-training improvements in visual processing speed regardless of whether it was administered under laboratory supervision or self-administered in the patient's home, and for both age strata (50-64 vs.  $\geq 65$ ).

### Strengths and Limitations of This Study:

- Strengths: this study design is a four-arm RCT that uses a large sample of men and women  $\geq 50$  years old and overcomes the important limitations of a previous multi-site trial.

- Limitations: although the sample is large, it was drawn from just one familycare center in which minorities are underrepresented, and data on the primary outcome are currently available only at randomization and after initial training (6-8 weeks post-randomization).

For peer review only

## Introduction

It is well established that age-related cognitive decline is a common, normal part of the aging process that occurs across many cognitive functions including memory, orientation, attention, abstract thinking, and perception [1-4]. These age-related cognitive changes can be viewed as the result of physical, behavioral, and environmental changes that combine to promote negative brain plasticity and degradations in functioning [5]. Fortunately, this capacity for physical and functional brain change across the lifespan is bi-directional [5,6]. Indeed, just as brain plasticity can lead towards degradation in cognitive functioning with age, this same plasticity process can also be used to strengthen cognitive abilities [7-9]. This is especially important given recent evidence demonstrating that these age-related declines commence as early as age 28 and then continue in a linear fashion throughout the remainder of the life course [9].

Many training programs have been developed to help mitigate these age-related cognitive functioning declines. Although the gains associated with most earlier cognitive training interventions appeared to be highly task-, and context-specific, more recent developments have demonstrated that improving the coordination of executive skills can transfer beyond the testing environment [7]. These often involve complex video games, task-switching paradigms, or divided attention tasks because these training platforms provide a carefully controlled and well-structured environment. Some of these successful interventions have focused on improving visual information processing

1  
2  
3 speed, which is not surprising given the considerable evidence that supports the role of  
4  
5 processing speed in age-related cognitive decline [10-12].  
6  
7

8 Perhaps the most extensively evaluated intervention that targets improving visual  
9  
10 processing speed is that developed by Ball and Roenker [4,13,14]. Their program trains  
11  
12 users to improve the speed and accuracy with which they identify and locate visual  
13  
14 information using a divided attention format. Over time, the difficulty and complexity of  
15  
16 each task is systematically increased as users attain specified performance criteria.  
17  
18 Manipulations to increase difficulty include decreasing visual stimuli duration, adding  
19  
20 visual or auditory distracters, increasing similarity between target and distracter stimuli,  
21  
22 and presenting visual targets over a broader spatial expanse. The basic tasks,  
23  
24 however, are always the same—central discrimination and peripheral target location.  
25  
26 Substantial evidence from the USA NIH-funded multi-site RCT known as ACTIVE  
27  
28 (Advanced Cognitive Training for Vital Elderly) has shown the efficacy of Ball and  
29  
30 Roenker's visual processing speed intervention on both immediate and distal cognitive  
31  
32 functioning, as well as on subsequent health outcomes [15-24].  
33  
34  
35  
36  
37  
38

39 Posit Science Corporation (San Francisco, California, USA) recently acquired the  
40  
41 rights to Ball and Roenker's visual speed of processing training program [4,13,14].  
42  
43 While all of the original tasks were maintained, the delivery platform was modified to be  
44  
45 user-friendly and self-administered. Gaming elements were also added to improve user  
46  
47 engagement and enhance compliance. The resulting second-generation computerized  
48  
49 visual speed of processing training program is known as *Road Tour*, and is  
50  
51 commercially available as part of the *Insight*<sup>tm</sup> visual processing speed suite, or as part of  
52  
53 the *DriveSharp*<sup>tm</sup> driving suite (<http://www.positscience.com/our-products>).  
54  
55  
56  
57  
58  
59  
60



1  
2  
3 We designed the Iowa Healthy and Active Minds Study (IHAMS) to evaluate the  
4 efficacy and effectiveness of *Road Tour*. IHAMS is a four-group parallel  
5  
6 RCT(NCT01165463) whose protocol has been described in detail elsewhere [25]. In  
7  
8 this article we report on the post-training (6-8 weeks post-randomization) results for the  
9  
10 primary outcome. Because no standard booster training occurred by this time, and  
11  
12 because supplemental training beyond 10 hours in the at-home group should have been  
13  
14 minimal, we hypothesize that participants randomized to *Road Tour* training (Groups 1,  
15  
16 2, and 4) should have significantly and similarly greater improvements in visual  
17  
18 processing speed immediately after training than the attention control group (Group 3).  
19  
20  
21  
22  
23  
24

### 25 **Methods and Analysis**

26  
27 Overview. Figure 1 shows the IHAMS study design and participant recruitment  
28  
29 results. IHAMS used a 3:3:4:4 allocation ratio and block randomization separately  
30  
31 within two age-strata (50-64 vs.  $\geq 65$ ). Participants were randomized to one of the  
32  
33 following groups: (1) 10 hours (over the first 5-6 weeks) of supervised on-site training  
34  
35 using *Road Tour* (Group 1), (2) 10 hours of supervised on-site training using *Road Tour*  
36  
37 plus 4 hours of booster training at 11 months post-randomization (Group 2), (3) 10 hours  
38  
39 of supervised on-site attention control (Group 3) using computerized crossword puzzles  
40  
41 (*Boatload of Crosswords*, Boatload Puzzles, LLC, Yorktown Heights, New York, USA),  
42  
43 or (4) self-administered at-home training using *Road Tour* for 10 hours or more (Group  
44  
45 4). Enrollment of the 681 participants occurred from April to November 2010, with 154  
46  
47 randomized to Group 1, 148 to Group 2, 188 to Group 3, and 191 to Group 4. Post-  
48  
49 training assessments occurred at 6-8 weeks post-randomization, and complete baseline  
50  
51 and post-training data were obtained for 616 participants (90.5%). One-year post-  
52  
53  
54  
55  
56  
57  
58  
59  
60

1  
2  
3 randomization assessments are scheduled to be completed by late November 2011.

4  
5 IHAMS was sized to provide  $\geq 80\%$  power to detect an effect size of 0.25 in the primary  
6  
7  
8 outcome at one-year post-randomization with  $\alpha = 0.05$ .

9  
10 Sampling Frame. We included all patients attending either the general internal or  
11  
12 family medicine clinics of the University of Iowa's Family Care Center (FCC) in the  
13  
14 IHAMS sampling frame. The electronic medical record was used for initially selecting  
15  
16 potentially eligible participants. The initial inclusion criteria were: (1) age  $\geq 50$  years old,  
17  
18 (2)  $\geq 2$  visits to a primary care physician in the FCC in the past year, and (3) the absence  
19  
20 of diagnostic codes for Alzheimer's or Picks' disease, arteriosclerotic dementia, other  
21  
22 of diagnostic codes for Alzheimer's or Picks' disease, arteriosclerotic dementia, other  
23  
24 senile or pre-senile dementia, dementia due to alcohol or drugs, amnesic syndrome, or  
25  
26 dementia due to other organic conditions. A total of 5,743 potentially eligible patients  
27  
28 were identified. Weekly random replicates of 100-250 of them were sent a letter  
29  
30 describing the study and asking them to telephone the project office and indicate  
31  
32 whether or not they were interested in participating.  
33  
34  
35

36 Telephone Screening. We attempted to further screen all potentially eligible  
37  
38 patients, but could not reach 1,627. Of the remainder, 2,079 declined to participate.  
39  
40 We conducted brief screening interviews to identify potential participants who met any of  
41  
42 the following exclusion criteria: (1) significant cognitive impairment based on  $\geq 3$  errors  
43  
44 on a 10-item mental status exam [26], (2) significant self-reported uncorrected visual  
45  
46 acuity problems, (3) not having a personal computer with a CD-ROM in the home, (4)  
47  
48 not having internet access, and (5) having previously used a computerized program for  
49  
50 improving cognitive function. This resulted in the exclusion of 1,356 potential  
51  
52  
53  
54  
55  
56  
57  
58  
59  
60 participants.

1  
2  
3 Informed Consent and Baseline Interviews.After completing the screening  
4  
5 interview, eligible patients were scheduled for a two-hour visit to our laboratory where  
6  
7 written informed consent was obtained. Then, the 681 enrollees were administered  
8  
9 their baseline (randomization) interviews by trained research assistants using computer-  
10  
11 assisted interviewing protocols. Immediately afterwards each participant was  
12  
13 randomized to one of the four study groups.  
14  
15

16  
17 Randomization Procedure. The study biostatistician (MPJ) determined the order  
18  
19 of assignments using a computer-generated list of random numbers and a 3:3:4:4 ratio  
20  
21 based on *a priori* power calculations. Block randomization was used to maintain  
22  
23 balance on two age-strata (50-64 and  $\geq 65$ ). Block sizes of 4, 8, and 12 were randomly  
24  
25 varied. The assignment for each participant's ID number was recorded on a participant  
26  
27 letter and then sealed in an opaque envelope with only the ID number visible. Two age-  
28  
29 strata specific boxes containing the assignment envelopes were stored in a locked  
30  
31 cabinet in the Project Coordinator's office. The Project Coordinator (MMD) had the  
32  
33 responsibility of unsealing the envelope (from the appropriate age-stratum box) and  
34  
35 revealing each participant's group assignment.  
36  
37  
38  
39

40  
41 Cognitive Processing Speed Outcomes. The six neuropsychological  
42  
43 assessments are: (1) the UFOV PC mouse version [27]; (2) the Symbol Digit Modalities  
44  
45 Test (SDMT) [28]; (3) the Trail Making A and B Tests (TMT) [29]; (4) the Controlled Oral  
46  
47 Word Association Test (COWAT) [30]; (5) the Digit Vigilance Test (DVT) [31]; and, (6)  
48  
49 the Stroop Color and Word Test (Stroop) [32]. The UFOV test is the primary outcome  
50  
51 and earlier versions of it have been used in most prior visual speed of processing  
52  
53 studies, including ACTIVE. It was administered at randomization and post-training (6-8  
54  
55  
56  
57  
58  
59  
60

1  
2  
3 weeks post-baseline), and will be administered at one-year post-randomization. The  
4  
5 UFOV includes three subtests—stimulus identification, divided attention, and selective  
6  
7 attention—each of which is scored from 17-500 milliseconds (ms) reflecting the shortest  
8  
9 exposure time at which the participant could correctly perform each subtest 75% of the  
10  
11 time, with a composite ms outcome score ranging from 51-1500 ms.  
12  
13

14  
15 The SDMT, TMT, COWAT, DVT, and Stroop tests are secondary outcome  
16  
17 measures, were all administered at randomization, and will be administered at one-year  
18  
19 post-randomization. SDMT captures divided attention and processing speed, and is  
20  
21 based on how many of 110 possible digit-symbol pairs were scored as correct pairs by  
22  
23 the participant in 90 seconds. TMT assesses visual scanning ability, processing speed,  
24  
25 and set-shifting/executive functioning, and is coded as the number of seconds needed  
26  
27 to correctly complete connecting the number and number-letter sets. COWAT assesses  
28  
29 verbal fluency based on the number of unique words beginning with the letter C (or F or  
30  
31 L) generated by the participant during 60 seconds, with a composite score of the  
32  
33 number of correct words used across the three letter trials. DVT assesses sustained  
34  
35 attention and psychomotor speed, is performed by crossing out randomly placed 6's in  
36  
37 59 rows of numbers, and is scored as the error and time totals. The Stroop assesses  
38  
39 processing speed and executive functioning, and is scored as the correct number of  
40  
41 words, colors, and color-words identified in 45 seconds on each subtest.  
42  
43  
44  
45  
46  
47

48 The Road Tour Training Program. *Road Tour's* basic appearance to the user is  
49  
50 shown in Figure 2a. After clicking on the start button to initiate training, Figure 2b is  
51  
52 shown. Here, both the license plate area and the eight circular locations in the near  
53  
54 orbit surrounding it are empty. The empty license plate is then replaced, as in Figure  
55  
56  
57  
58  
59  
60

1  
2  
3 2c, with the target vehicle, either a car or a truck. Similarly, the eight empty circular  
4  
5 locations surrounding the license plate are then replaced with seven distracter stimuli  
6  
7 (rabbit crossing signs) or the target sign (Route 66). The stimuli (car vs. truck, and  
8  
9 rabbit crossing vs. Route 66 sign) are presented for a specified time and are then  
10  
11 replaced by Figure 2d. The amount of time that Figure 2c remains on the screen before  
12  
13 being replaced by Figure 2d is measured in ms. In Figure 2e, both target vehicles (the  
14  
15 car and truck) are presented in the center of the screen, one of which was previously  
16  
17 shown in Figure 2c as the target. The user first clicks on the correct target vehicle (car  
18  
19 or truck), and then on the circular location where the correct peripheral target (Route 66  
20  
21 sign) appeared (Figure 2f). The goal is to improve cognitive processing speed by  
22  
23 progressively reducing the ms of exposure that Figure 2c remains on the screen with  
24  
25 subsequent correct identification of both the stimuli (car or truck) and target (Route 66)  
26  
27 sign. As the user progresses, three changes occur which further increase task difficulty:  
28  
29 (a) the target visual field expands by progressing outward from the license plate to add  
30  
31 medium and distal orbits, (b) these are accompanied by an increasing number of  
32  
33 distracters to fully populate all three orbits (up to 47), and (c) the vehicle pairs morph  
34  
35 through 9 different stages or pairs to become more similar and thus more difficult to  
36  
37 differentiate.  
38  
39  
40  
41  
42  
43  
44

45 Analysis. First, one-way analysis of variance for selected participant  
46  
47 characteristics, training time, and the six neuropsychological outcomes was conducted.  
48  
49 The interrelationships among the six neuropsychological assessments at baseline were  
50  
51 then explored using exploratory factor analysis. To assess the effects of *Road Tour*  
52  
53 training (vs. attention control training) on the primary outcome, we used multiple logistic  
54  
55  
56  
57  
58  
59  
60

1  
2  
3 regression analysis. Our first model involved the single binary contrast of being  
4 randomly assigned to any *Road Tour* training, adjusting for the value at randomization.  
5  
6 We then substituted three mutually exclusive binary indicators for the single binary  
7 contrast. These three binary indicators reflect whether the participant was in the on-site  
8 speed of processing intervention without boosters, the on-site speed of processing  
9 intervention with boosters, or the at-home speed of processing group vs. those in the on-  
10 site crossword puzzle (attention control) group as the reference or omitted category.  
11  
12 We then estimated both the first and second model separately within each age stratum.  
13  
14  
15  
16  
17  
18  
19  
20  
21

## 22 Results

23  
24 Baseline Group Comparisons. Table 1 compares the four treatment groups on  
25 selected participant characteristics (including the self-rated health and change in self-  
26 rated health from one-year ago items from the SF-36 [33]), amount of training (in  
27 minutes) received, and the six neuropsychological tests at randomization. No  
28 significant differences were found for any of the participant characteristics. Significant  
29 differences were observed, however, on the amount of training received. The attention  
30 control group received the most training, while the at-home *Road Tour* training group  
31 received the least. This is not surprising given the efforts to schedule the five, two-hour  
32 training sessions for all participants in the three on-site training groups. Moreover, on-  
33 site *Road Tour* participants were allowed to stop their training once they had completed  
34 all 81 of the available exercise sets, which occurred about 5% of the time. Finally,  
35 although *Road Tour* directly monitors training in minutes based on actual program  
36 usage, participant training in the attention control group was monitored by project staff  
37 based on the completion of two-hour training sessions.  
38  
39  
40  
41  
42  
43  
44  
45  
46  
47  
48  
49  
50  
51  
52  
53  
54  
55  
56  
57  
58  
59  
60

1  
2  
3  
4  
5  
6  
7  
8  
9  
10  
11  
12  
13  
14  
15  
16  
17  
18  
19  
20  
21  
22  
23  
24  
25  
26  
27  
28  
29  
30  
31  
32  
33  
34  
35  
36  
37  
38  
39  
40  
41  
42  
43  
44  
45  
46  
47  
48  
49  
50  
51  
52  
53  
54  
55  
56  
57  
58  
59  
60

Significant differences between the groups were also observed for the SDMT, TMT (A and B), and the word and color sub-tests of the Stroop. In all cases, the attention control group demonstrated the lowest level of performance. These differences, however, were modest in the absolute, although *post-hoc* comparisons using Dunnett tests found 8 of the 15 group level contrasts involving Group 3 (attention control) to be statistically significant. Group 3 had significantly lower performance than (a) Group 1 on the SDMT, (b) Groups 1, 2, and 4 on the TMT-A, (c) Group 1 on the TMT-B, (d) Groups 1 and 4 on the Stroop word subtest, and (e) Group 1 on the Stroop color subtest. Therefore, we will adjust for these differences in all subsequent analyses by including the value of the outcome measure at randomization.

Factor Structure among the Outcomes. To examine the interrelationships among the six neuropsychological assessments at baseline, exploratory factor analyses were conducted using principal components extraction methods with oblique rotation. As shown in Table 2, three factors were extracted that had eigenvalues  $\geq 1.00$  (4.38, 1.21, and 1.08, respectively). These three factors accounted for 66.7% of the variance among the ten component scores of the neuropsychological assessments and resulted in a simple factor structure (factor loadings  $< 0.500$  omitted for clarity; [36,37]). Based on the assessments that loaded on them, Factor 1 reflects processing speed under divided attention, Factor 2 reflects processing speed under sustained attention, and Factor 3 reflects processing speed in the absence of divided or sustained attention. While Factor 2 was orthogonal to (or uncorrelated with) Factors 1 and 3 ( $r \leq 0.02$ ), Factors 1 and 3 were highly correlated ( $r = 0.47$ ). These results suggest that any effects found for *Road Tour* on the UFOV test at post-training should, to some

1  
2  
3 extent, transfer to the other assessments, except perhaps for the DVT. Definitive  
4  
5 evidence, however, must await the availability of the one-year post-randomization data.  
6  
7

8 Post-Training Effects. To assess the hypothesis that random assignment to any of  
9  
10 the *Road Tour* treatment groups should have resulted in significantly greater and similar  
11  
12 post-training improvements (6-8 weeks post-randomization) in visual processing speed  
13  
14 compared to the attention control group, we conducted intent-to-treat analysis using  
15  
16 multiple logistic regression models to predict improvements  $\geq 100$  ms. We chose logistic  
17  
18 regression and this specific effect threshold for two reasons. First, the distribution on the  
19  
20 UFOV test at both randomization and 6-8 weeks post-randomization is not normal, in  
21  
22 part due to the left and right censoring on each of the three UFOV subtest components.  
23  
24 Second, the 100 ms threshold represents a clinically meaningful improvement that  
25  
26 corresponds to a standard deviation of 0.55.  
27  
28  
29  
30

31  
32 At post-training, complete data on the UFOV tests were available for 616  
33  
34 participants (90.4%). With these data, we first conducted pooled analyses (i.e., both  
35  
36 age strata) of random assignment to any *Road Tour* training group vs. the attention  
37  
38 control group, adjusting for the UFOV test at randomization. The adjusted odds ratio  
39  
40 (*AOR*) for being randomized to any *Road Tour* training group on achieving a post-  
41  
42 training improvement in the UFOV test  $\geq 100$  ms was 4.85 ( $CI_{95\%} = 2.60$  to  $9.05$ ;  $p <$   
43  
44  $.001$ ). The absolute improvement effect was 12.2% (34.3% of *Road Tour* subjects  
45  
46 improved  $\geq 100$  ms vs. 23.1% of attention control subjects). Not surprisingly,  
47  
48 participants with slower UFOV test scores at randomization were more likely to have  
49  
50 achieved post-randomization improvements, reflecting a 1% greater likelihood per  
51  
52  
53  
54  
55  
56  
57  
58  
59  
60



ms( $AOR = 1.01$ ;  $CI_{95\%} = 1.01$  to  $1.02$ ;  $p < .001$ ). This simple model fit the data extremely well (*Area Under the Curve* [ $AUC$ ] =  $0.92$ ).

To assess the similarity of the three *Road Tour* groups vs. the attention control group, we then replaced the single binary marker with a set of three indicators for being in Group 1, Group 2, or Group 4 vs. the attention control group (Group 3). Table 3 first shows these results for the pooled age strata, and then separately for each age stratum. The pooled analysis indicates that while the three *Road Tour* groups'  $AORs$  vary from  $4.01$  to  $5.52$  ( $p$  values  $< .001$ ;  $AUC = 0.92$ ; absolute improvement effects  $10.0\%$  to  $12.5\%$ ), they all fall within the others' confidence intervals, reflecting similar effect sizes. Comparable results were found within age strata, although the model for the younger age stratum fit the data slightly better ( $AUC = 0.95$  vs.  $AUC = 0.86$ ). Taken together, these results support our hypothesis for the post-training effects in all respects.

### Conclusion

Gradual cognitive decline is nearly universal and is well-recognized as a normal part of the aging process. According to Salthouse [36], most age-related cognitive deteriorations are at least partially attributable to declines in information processing speed, which affects episodic and working memory, verbal fluency, and reasoning abilities. Previous work, especially the USA NIH-funded multi-site ACTIVE trial has led to the development of a promising, second-generation computer-based intervention to improve visual processing speed known as *Road Tour*. We designed IHAMS to assess the efficacy and effectiveness of *Road Tour*.

IHAMS is an RCT with participants randomized to four groups. Group 1 received a standard dose of computerized visual processing speed training on-site in our

1  
2  
3 laboratory. Group 2 also received a standard dose of computerized visual processing  
4 speed training on-site, but was invited back to our laboratory for 4 hours of subsequent  
5 booster training. Group 3 received an equivalent dose of attention control training using  
6 computerized crossword puzzles on-site in our laboratory. Group 4 took the visual  
7 processing speed training software home and was instructed to use it on their  
8 own personal computer for at least a standard dose. The primary outcome is visual  
9 processing speed as measured by the UFOV test.  
10  
11  
12  
13  
14  
15  
16  
17  
18  
19

20 In this article, we reported on an exploratory factor analysis of the six  
21 neuropsychological assessments at randomization, and on an efficacy analysis of the  
22 post-training (6-8 weeks post-randomization) data. The exploratory factor analysis  
23 indicated that all of the neuropsychological assessments were highly inter-correlated,  
24 except for the DVT. This suggests that effects found for *Road Tour* on the UFOV test at  
25 post-training should, to some extent, transfer to the secondary outcomes, except  
26 perhaps for the DVT. Definitive evidence, however, must await the availability of the  
27 one-year post-randomization data. As with prior studies involving an earlier version of  
28 the intervention [4,13,14,16,17], the post-training efficacy analysis yielded statistically  
29 and clinically significant improvements in visual processing speed associated with  
30 random assignment to a 10-hour dose of *Road Tour* training. The results also showed  
31 that speed of processing interventions like *Road Tour* can be self-administered in the  
32 patient's home and appear equally effective under those circumstances as when used  
33 under supervision in a laboratory. Furthermore, these results provided the first solid  
34 evidence that visual speed of processing interventions like *Road Tour* are efficacious  
35 among 50-64 year olds as well as among those aged 65 years old or older. In future  
36  
37  
38  
39  
40  
41  
42  
43  
44  
45  
46  
47  
48  
49  
50  
51  
52  
53  
54  
55  
56  
57  
58  
59  
60

1  
2  
3 analyses, we will evaluate the impact of the intervention at one-year on all outcomes,  
4  
5 after these data become available.  
6  
7  
8  
9  
10  
11  
12  
13  
14  
15  
16  
17  
18  
19  
20  
21  
22  
23  
24  
25  
26  
27  
28  
29  
30  
31  
32  
33  
34  
35  
36  
37  
38  
39  
40  
41  
42  
43  
44  
45  
46  
47  
48  
49  
50  
51  
52  
53  
54  
55  
56  
57  
58  
59  
60

For peer review only

## End Matter

Acknowledgements: The authors acknowledge and applaud the 681 participants from the University of Iowa Family Care Center(FCC) general internal and family medicine clinics. Without their participation and support, this study would not have been possible. The authors also acknowledge the research assistants, work-study students, and other support staff involved in IHAMS.

Funding:This study was supported by US NIH grant RC1 AG-035546 to FDW.

Competing Interests:The *Road Tour* computerized visual speed of processingintervention used in IHAMS is commercially available from Posit Science Corporation (San Francisco, CA, USA).None of the members of the investigative team have any conflicts of interest or commitment involving Posit Science. Specifically, no one on the investigative team will financially profit in any way from the use of *Road Tour*.

Posit Science acquired ownership in October 2007 of Ball and Roenker's [4,13,14] original speed of processing intervention that was used in the multi-site ACTIVE RCT on which FDW was an original co-investigator (at the ACTIVE Indiana University site). In collaboration with Professors Ball and Roenker, Posit Science subsequently developed the second-generation, value-added version of the visual speed of processing intervention known as *Road Tour* and used here in IHAMS. From December 2007 to March 2009, FDW had a limited, part-time consulting arrangement (15 days, total) with Posit Science to support additional analyses of the first five-years of the ACTIVE follow-up data that had not been identified in the original ACTIVE protocols nor funded by the various US NIH grants supporting ACTIVE. This arrangement was

1  
2  
3 approved in advance by the ACTIVE Executive Committee (which included the US NIH  
4 project officers), and was sanctioned by the Provost of the University of Iowa.  
5  
6  
7

8 After terminating this limited, part-time consulting arrangement with Posit  
9 Science, FDW applied in April 2009 for, and was awarded in September 2009 the US  
10 NIH Challenge Grant known as IHAMS. Posit Science provided the 700 copies of *Road*  
11 *Tour* used in IHAMS at no cost or obligation. Furthermore, in its letter of commitment to  
12 IHAMS and the US NIH, Posit Science stated should the results support the efficacy  
13 and effectiveness of *Road Tour*, they will “work with agencies at the federal government  
14 to make the program available for wide-scale implementation at only a fraction of the  
15 current per-user cost.”  
16  
17  
18  
19  
20  
21  
22  
23  
24  
25

26  
27 Ethics Approval: Ethics approval was provided by the University of Iowa  
28 Institutional Review Board (IRB-03; IRB protocol number 200908789), initially approved  
29 on September 12, 2009, and most recently re-approved on May 18, 2011.  
30  
31  
32  
33

34 Contributors: FDW is the principal investigator on the study, wrote the original  
35 proposal, supervised the trial, conducted all of the analyses, and drafted the manuscript.  
36 MWV-W is co-principal investigator on the study, collaborated on the original proposal,  
37 co-supervised the trial, and reviewed the analyses reported here as well as the  
38 manuscript itself. MBH is a post-doctoral fellow working on the study, trained all of the  
39 interviewers, supervised the scoring of the neuropsychological tests, and reviewed the  
40 manuscript. MPJ is the study biostatistician, devised the randomization protocol,  
41 reviewed all of the analyses, and reviewed the manuscript. RM is a co-investigator on  
42 the study, reviewed all of the ethics, consent, and IRB documents, and reviewed the  
43 manuscript. TML was a study Research Assistant who assisted with piloting the  
44  
45  
46  
47  
48  
49  
50  
51  
52  
53  
54  
55  
56  
57  
58  
59  
60

1  
2  
3 interview protocol, conducted randomization interviews, and reviewed the manuscript.  
4  
5 KD is the study neuropsychologist, supervised selection of the neuropsychological tests,  
6  
7 reviewed the psychometric analyses, and reviewed the manuscript. CG is the medical  
8  
9 director of the FCC General Medicine Clinic, participated in subject recruitment, and  
10  
11 reviewed the manuscript. SW is the medical director of the FCC Family Medicine Clinic,  
12  
13 participated in subject recruitment, and reviewed the manuscript. MMD is the Project  
14  
15 Coordinator.  
16  
17  
18  
19

20 Provenance and Peer Review: IHAMS was not a commissioned study. It was  
21  
22 externally peer reviewed by a panel of Distinguished Editors (ZRG1 RPHB-E 58)  
23  
24 convened by the US NIH to select approximately 200 (from a pool of about 23,000  
25  
26 submitted) Challenge Grant Applications (RC1s) submitted in response to the American  
27  
28 Recovery and Reinvestment Act of 2009.  
29  
30  
31  
32  
33  
34  
35  
36  
37  
38  
39  
40  
41  
42  
43  
44  
45  
46  
47  
48  
49  
50  
51  
52  
53  
54  
55  
56  
57  
58  
59  
60

## References

1. Birren JE, Woods AM, & Williams MV. Behavioral slowing with age: causes, organization, and consequences of slowing. Pp. 293–308 in Poon LW (ed), *Aging in the 1980s: psychological issues*. Washington, DC: American Psychological Association, 1980.
2. Edwards JD, Wadley VG, Myers RS, Roenker DL, Cissell GM, & Ball KK. Transfer of a speed of processing intervention to near and far cognitive functions. *Gerontol*, 2002;48:329–340.
3. Madden DJ. Four to ten milliseconds per year: age-related slowing of visual word identification. *J Gerontol: Psych Sci*, 1992;47:P59–P68.
4. Roenker DL, Cissell GM, Ball KK, Wadley VG, & Edwards JD. Speed-of-processing and driving simulator training result in improved driving performance. *Hum Factors*, 2003;45:218–233.
5. Mahncke HW, Bronstone A, & Merzenich MM. Brain plasticity and functional losses in the aged: scientific bases for a novel intervention. *Prog Brain Res*, 2006;157:81-109.
6. Greenwood PM. Functional plasticity in cognitive aging: review and hypothesis. *Neuropsychol*, 2007;21:657-673.
7. Hertzog C, Kramer AF, Wilson RS, & Lindenberger U. Enrichment effects on adult cognitive development: can the functional capacity of older adults be preserved and enhanced? *PsycholSci Pub Interest*, 2008;9:1-65.
8. Salthouse TA. Consequences of age-related cognitive declines. *Ann Rev Psychol*, 2012;63: in press.

- 1  
2  
3 9. Salthouse TA. When does age-related cognitive decline begin? *Neurobiol Aging*,  
4  
5 2009;30:507-514.  
6  
7
- 8 10. Clay OJ, Edwards JD, Ross LA, Okonkwo O, Wadley VG, Roth DL, & Ball KK.  
9  
10 Visual function and cognitive speed of processing mediate age-related decline in  
11  
12 memory span and fluid intelligence. *J Aging Health*, 2009;21:547-566.  
13  
14
- 15 11. Lemke U, & Zimprich D. Longitudinal changes in memory performance and  
16  
17 processing speed in old age. *Aging, Neuropsychol, Cog*, 2005;12:57-77.  
18  
19
- 20 12. Zimprich DM. Can longitudinal changes in processing speed explain longitudinal  
21  
22 changes in fluid intelligence? *Psychol Aging*, 2002;17:690-695.  
23  
24
- 25 13. Ball KK, Edwards JD, & Ross LA. The impact of speed of processing training on  
26  
27 cognitive and everyday functions. *J Gerontol: SocSci*, 2007;62B:19-31.  
28  
29
- 30 14. Ball KK, Beard BL, Roenker DL, Miller RL, & Griggs DS. Age and visual search:  
31  
32 expanding the useful field of view. *J Optic Soc Amer*, 1988;5:2210-2219.  
33  
34
- 35 15. Jobe JB, Smith DM, Ball KK, Tennstedt SL, Marsiske M, Willis SL, Rebok GW,  
36  
37 Morris JN, Helmers KF, Leveck MD, & Kleinman K. ACTIVE: a cognitive  
38  
39 intervention trial to promote independence in older adults. *Controlled Clin Trials*,  
40  
41 2001;22:453-479.  
42  
43
- 44 16. Ball KK, Berch DB, Helmers KF, Jobe JB, Leveck MD, Marsiske M, Morris JN,  
45  
46 Rebok GW, Smith DM, Tennstedt SL, Unverzagt FW, & Willis SL. Effects of  
47  
48 cognitive training interventions with older adults: a randomized controlled trial.  
49  
50 *JAMA*, 2002;288:2271-2281.  
51  
52
- 53 17. Willis SL, Tennstedt SL, Marsiske M, Ball KK, Elias J, Mann-Koepke K, Morris JN,  
54  
55 Rebok GW, Unverzagt FW, Stoddard A, & Wright E. Long-term effects of  
56  
57  
58  
59  
60



- 1  
2  
3 cognitive training on everyday functional outcomes in older adults. *JAMA*,  
4 2006;296:2805-2814.  
5  
6  
7
- 8 18. Wolinsky FD, Mahncke HW, Kosinski M, Unverzagt FW, Smith DM, Jones R,  
9 Stoddard A, &Tennstedt SL. The ACTIVE cognitive training trial and predicted  
10 medical expenditures. *BMC Health Serv Res*, 2009;9:109:1-9.  
11  
12
- 13 19. Wolinsky FD, Unverzagt FW, Smith DM, Jones R, Wright E, &Tennstedt S. The  
14 effects of the ACTIVE cognitive training interventions on clinically relevant  
15 declines in health-related quality of life. *J Gerontol: SocSci*, 2006;61B:S281-  
16 S287.  
17  
18  
19  
20  
21  
22  
23
- 24 20. Wolinsky FD, Unverzagt FW, Smith DM, Jones R, Stoddard A, &Tennstedt S. The  
25 ACTIVE cognitive training trial and health-related quality of life: protection that  
26 lasts for five years. *J Gerontol: Med Sci*, 2006;61A:1324-1329.  
27  
28  
29  
30
- 31 21. Wolinsky FD, Vander Weg MW, Martin R, Unverzagt FW, Ball KK, Jones R,  
32 &Tennstedt SL. The effect of speed of processing training on depressive  
33 symptoms in ACTIVE. *J Gerontol: MedSci*, 2009;64A:468-472.  
34  
35  
36  
37  
38
- 39 22. Wolinsky FD, Mahncke HW, Vander Weg MW, Martin R, Unverzagt FW, Ball KK,  
40 Jones R, &Tennstedt SL. The ACTIVE cognitive training interventions and the  
41 onset of and recovery from suspected clinical depression. *J Gerontol:*  
42 *PsycholSci*, 2009;64B:577-585.  
43  
44  
45  
46  
47
- 48 23. Wolinsky FD, MahnckeHW, Vander WegMW, MartinR, UnverzagtFW, BallKK,  
49 JonesR, &TennstedtSL. Speed of processing training improves self-rated health  
50 in older adults: enduring effects observed in the multi-site ACTIVE study.  
51  
52  
53  
54  
55  
56  
57  
58  
59  
60

- 1  
2  
3  
4  
5  
6  
7  
8  
9  
10  
11  
12  
13  
14  
15  
16  
17  
18  
19  
20  
21  
22  
23  
24  
25  
26  
27  
28  
29  
30  
31  
32  
33  
34  
35  
36  
37  
38  
39  
40  
41  
42  
43  
44  
45  
46  
47  
48  
49  
50  
51  
52  
53  
54  
55  
56  
57  
58  
59  
60
24. Wolinsky FD, Vander Weg MW, Martin R, Unverzagt FW, Willis SL, Marsiske M, Rebok GW, Morris JN, Ball KK, & Tennstedt SL. Cognitive training improves internal locus of control among older adults. *J Gerontol: Soc Sci*, 2010;65B:470-478.
25. Wolinsky FD, Vander Weg MW, Howren MB, Jones MP, Martin R, Luger TM, Duff K, Goerdt C, Wolfe S, & Dotson M. Protocol for a randomized controlled trial to improve cognitive functioning in older adults: the Iowa Healthy and Active Minds Study. *BMJ Open*, 2011-000218, in press.
26. Pfeiffer EA. A short portable mental status questionnaire for the assessment of organic brain deficit in elderly patients. *J Am Geriatr Soc*. 1975;23:433-41.
27. Edwards JD, Vance DE, Wadley VG, Cissel GM, Roenker DL, & Ball KK. Reliability and validity of Useful Field of View test scores as administered by personal computer. *J Clin Exper Neuropsychol*, 2005;27:529-543.
28. Smith A. *Symbol digit modality test*. Los Angeles, CA: Western Psychological Services, 1982.
29. Reitan RM, & Wolfson, D. *The Halstead-Reitan neuropsychological test battery: therapy and clinical interpretation*. Tucson, AZ: Neuropsychological Press, 1985.
30. Benton AL, Hamsher K, & Silvan AB. *Multilingual aphasia examination* (3rd Edition). Iowa City, IA: AJA Associates, 1994.
31. Lewis R, & Rennick PM. *Manual for the repeatable cognitive-perceptual-motor battery*. Gross Point, MI: Axon, 1979.
32. Golden CJ. *The Stroop color and word test*. Chicago, IL: Stoelting Company, 1978.

- 1  
2  
3  
4  
5  
6  
7  
8  
9  
10  
11  
12  
13  
14  
15  
16  
17  
18  
19  
20  
21  
22  
23  
24  
25  
26  
27  
28  
29  
30  
31  
32  
33  
34  
35  
36  
37  
38  
39  
40  
41  
42  
43  
44  
45  
46  
47  
48  
49  
50  
51  
52  
53  
54  
55  
56  
57  
58  
59  
60
33. McHorney CA, Ware JE, &Raczek R. The MOS 36-Item Short-Form health survey (SF-36): II. Psychometric and clinical tests of validity in measuring physical and mental health constructs. *Med Care*, 1993;31:247-263.
34. DeVellis RF. *Scale development: theory and applications*. Newbury Park, CA: Sage, 1991.
35. Nunnally JC. *Psychometric theory*. New York, NY: McGraw-Hill, 1967.
36. Salthouse TA. The processing-speed theory of adult age differences in cognition. *Psychol Rev*, 1996;103:403-428.

1  
2  
3  
4  
5  
6  
7  
8  
9  
10  
11  
12  
13  
14  
15  
16  
17  
18  
19  
20  
21  
22  
23  
24  
25  
26  
27  
28  
29  
30  
31  
32  
33  
34  
35  
36  
37  
38  
39  
40  
41  
42  
43  
44  
45  
46  
47  
48  
49  
50  
51  
52  
53  
54  
55  
56  
57  
58  
59  
60

For peer review only

Figure 1. IHAMS CONSORT Flow Diagram.

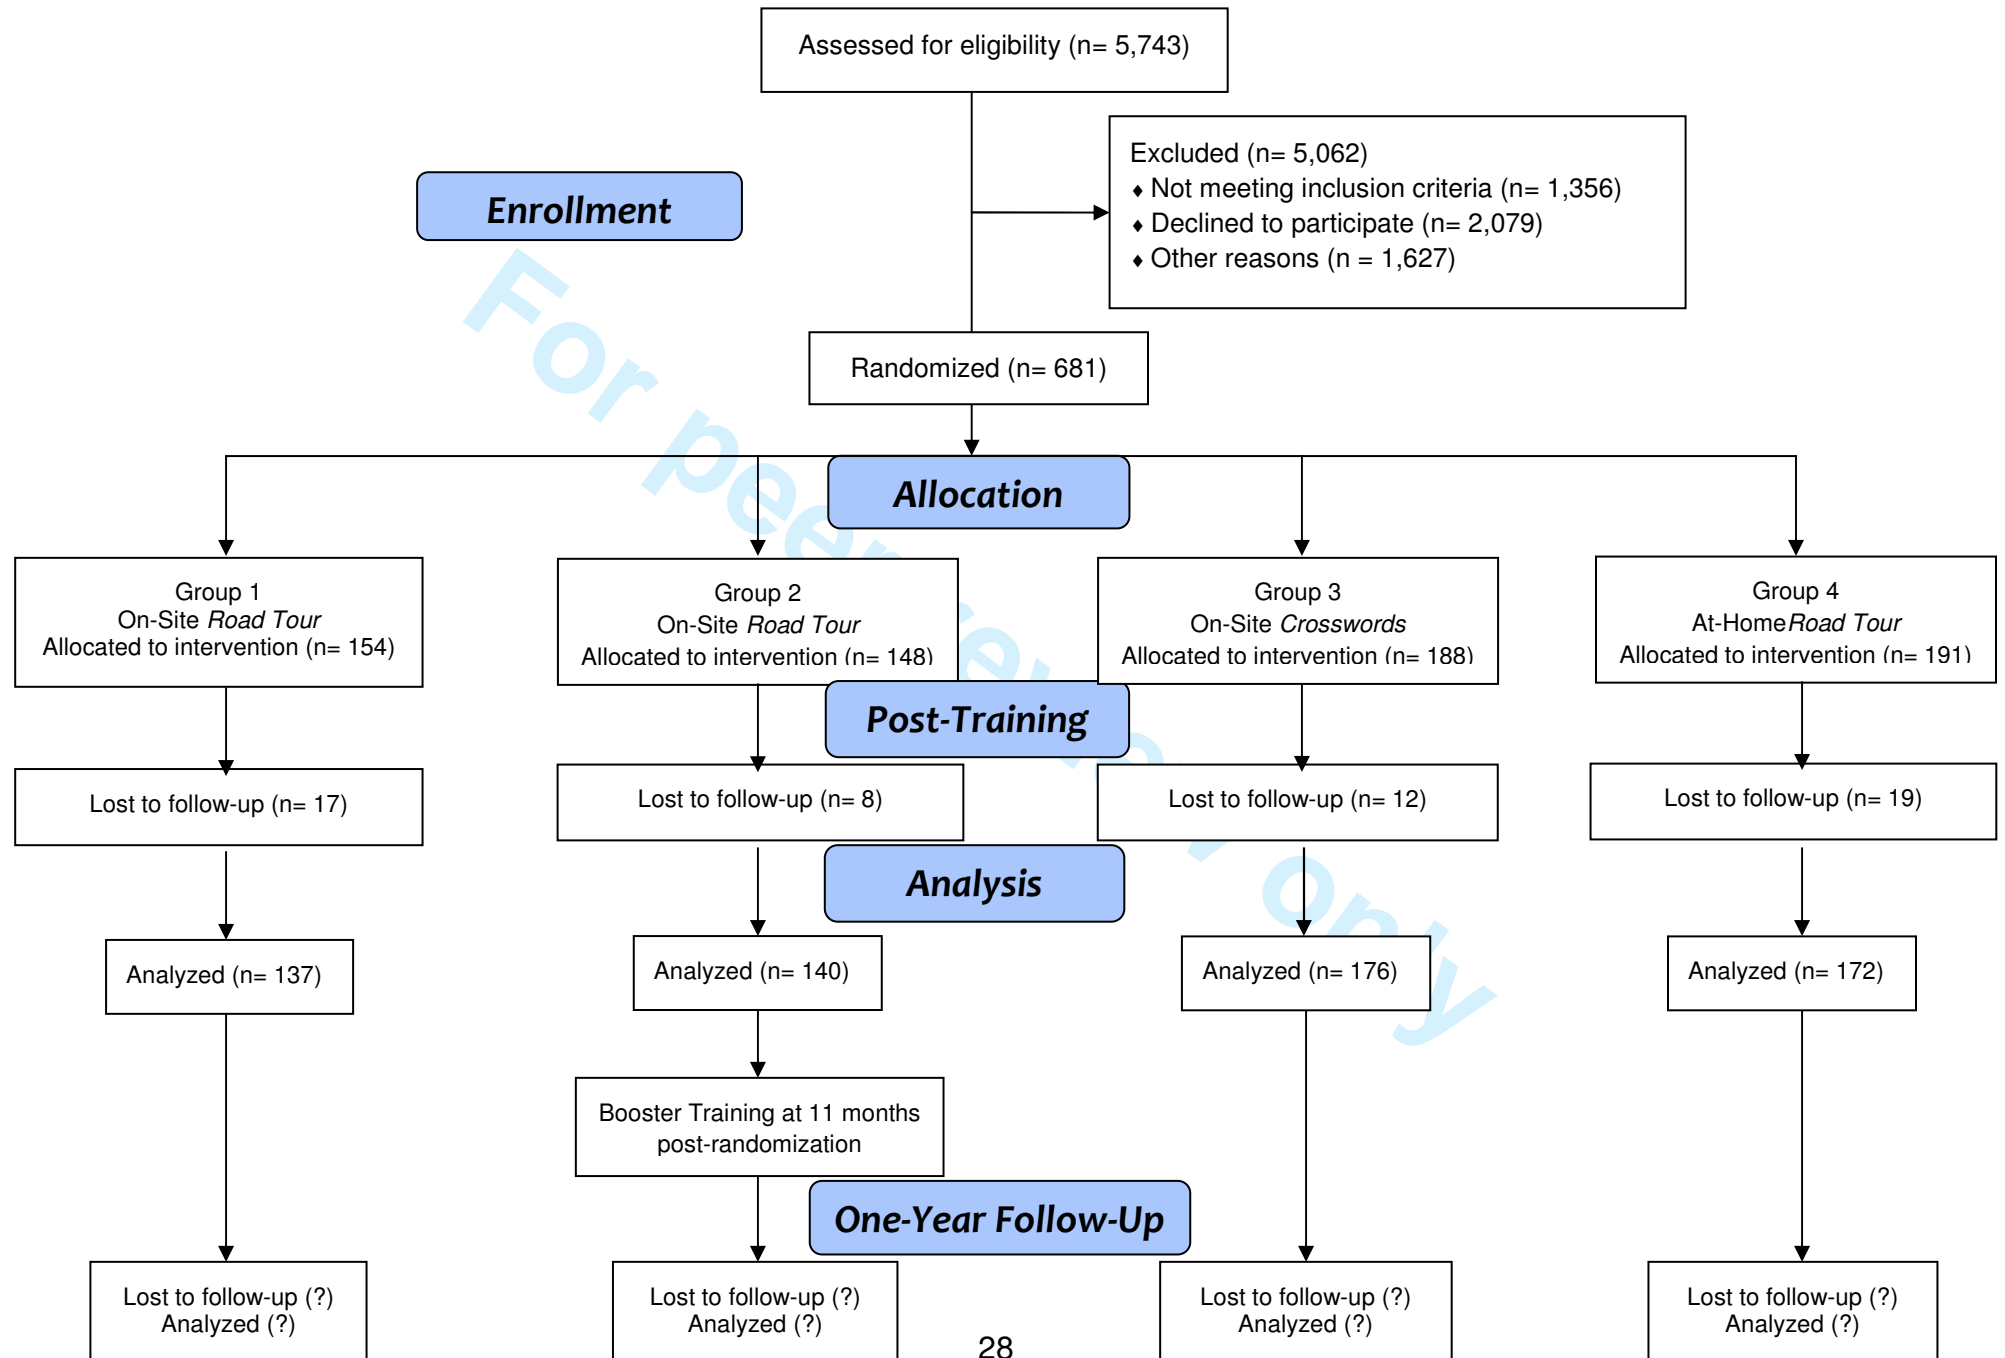

1  
2  
3  
4  
5  
6  
7  
8  
9  
10  
11  
12  
13  
14  
15  
16  
17  
18  
19  
20  
21  
22  
23  
24  
25  
26  
27  
28  
29  
30  
31  
32  
33  
34  
35  
36  
37  
38  
39  
40  
41  
42  
43  
44  
45  
46  
47  
48  
49

For peer review only

Figures 2a-f. The Initial Road Tour Sequence.

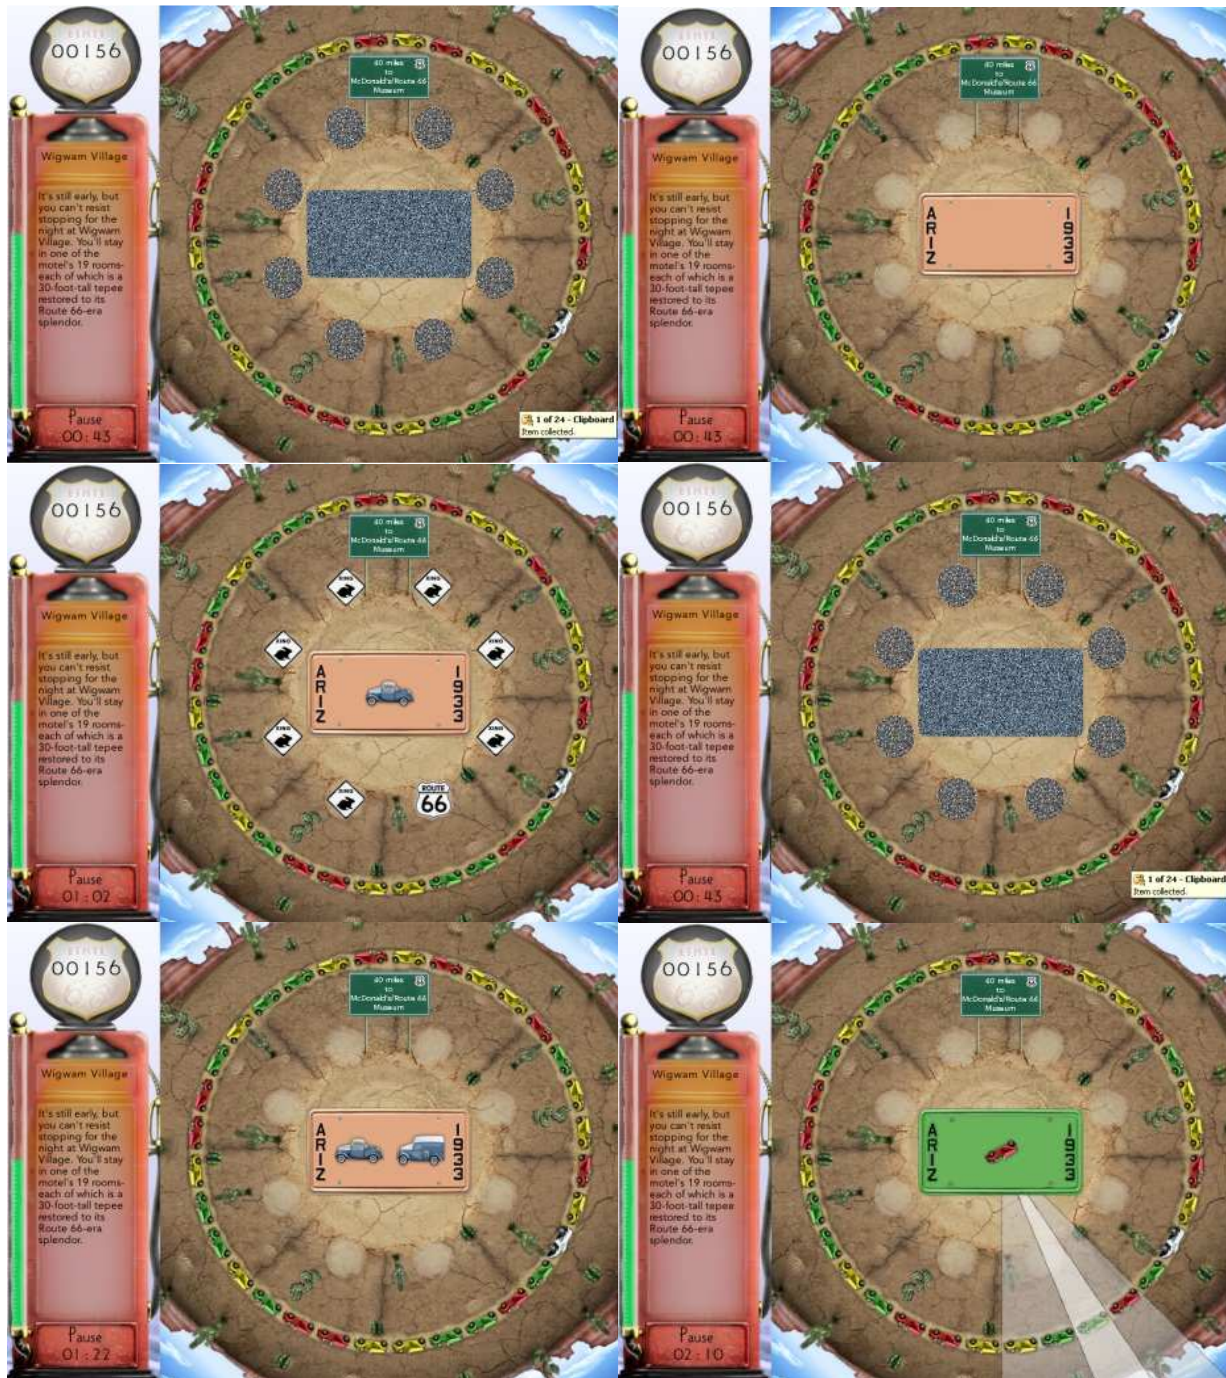

Table 1. Means of Selected Participant Characteristics and the Six Neuropsychological Tests at Randomization by Treatment Group Status, N = 681.

| Variable                                                       | Overall<br>N=681 | Group 1<br>N=148 | Group 2<br>N=154 | Group 3<br>N=188 | Group 4<br>N=191 | <i>p</i><br>value |
|----------------------------------------------------------------|------------------|------------------|------------------|------------------|------------------|-------------------|
| <i>Personal Characteristics</i>                                |                  |                  |                  |                  |                  |                   |
| Age (years)                                                    | 61.9             | 61.4             | 62.5             | 61.8             | 61.9             | 0.676             |
| Men (%)                                                        | 37.3             | 37.2             | 32.5             | 42.0             | 36.7             | 0.340             |
| Married (%)                                                    | 69.9             | 73.0             | 61.0             | 73.4             | 71.2             | 0.053             |
| Single (%)                                                     | 11.2             | 10.1             | 14.9             | 8.0              | 12.0             | 0.219             |
| Working (%)                                                    | 54.5             | 56.8             | 53.9             | 50.0             | 57.6             | 0.459             |
| Retired (%)                                                    | 35.5             | 35.1             | 36.4             | 34.2             | 34.6             | 0.982             |
| Income ≤ \$35K (%)                                             | 28.3             | 24.3             | 36.4             | 27.7             | 25.7             | 0.079             |
| Income ≥ \$75K (%)                                             | 46.6             | 45.3             | 41.6             | 47.3             | 50.8             | 0.383             |
| Self-Rated Health<br>(5=best 1=worst)                          | 3.8              | 3.8              | 3.8              | 3.7              | 3.9              | 0.526             |
| One-Year Change in<br>Self-Rated<br>Health(5=best 1<br>=worst) | 3.2              | 3.3              | 3.3              | 3.2              | 3.3              | 0.646             |
| <i>Training Time</i>                                           |                  |                  |                  |                  |                  |                   |
| Minutes of Training                                            | 469              | 450              | 488              | 535              | 404              | 0.001             |
| <i>Neuropsychological Tests</i>                                |                  |                  |                  |                  |                  |                   |
| UFOV Composite<br>(ms)                                         | 300.0            | 282.7            | 301.2            | 319.9            | 292.8            | 0.277             |
| SDMT (# correct)                                               | 50.5             | 51.8             | 50.5             | 48.7             | 51.1             | 0.015             |
| Trails A (sec)                                                 | 41.9             | 40.9             | 39.8             | 45.0             | 41.2             | 0.001             |
| Trails B (sec)                                                 | 66.9             | 63.8             | 65.8             | 71.8             | 65.2             | 0.030             |
| COWAT Composite (#<br>words)                                   | 42.0             | 42.4             | 41.9             | 40.5             | 43.2             | 0.153             |
| DVT Errors (#)                                                 | 8.1              | 7.5              | 9.0              | 7.9              | 8.0              | 0.427             |
| DVT Time (sec)                                                 | 377.0            | 369.0            | 374.8            | 387.9            | 374.5            | 0.190             |
| Stroop Word (#)                                                | 70.4             | 71.2             | 71.8             | 68.1             | 71.1             | 0.038             |
| Stroop Color (#)                                               | 97.8             | 100.3            | 96.5             | 95.3             | 99.3             | 0.032             |
| Stroop Color-Word (#)                                          | 38.1             | 38.7             | 38.0             | 37.1             | 38.6             | 0.337             |



Table 2. Exploratory Factor Analysis of Baseline Neuropsychological Tests, N=681.

| Test              | Factor 1 | Factor 2 | Factor 3 |
|-------------------|----------|----------|----------|
| Trails A          | -.823    |          |          |
| Trails B          | -.823    |          |          |
| UFOV Composite    | -.761    |          |          |
| SDMT              | .587     |          |          |
| DVT Errors        |          | .876     |          |
| DVT Time          |          | -.621    |          |
| COWAT Composite   |          |          | .775     |
| Stroop Word       |          |          | .765     |
| Stroop Color      |          |          | .717     |
| Stroop Color-Word |          |          | .699     |

Table 3. Pooled and Age-Stratum Specific Multiple Logistic Regression Results for  $\geq 100$  ms Improvements on the UFOV test at 6-8 Weeks Post-Randomization.

|                                                          | <i>Adjusted Odds Ratio</i> | <i>P value</i> | Lower CI <sub>95%</sub> | Higher CI <sub>95%</sub> |
|----------------------------------------------------------|----------------------------|----------------|-------------------------|--------------------------|
| Pooled Analysis with Both Age Strata (N = 616)           |                            |                |                         |                          |
| Group 1                                                  | 4.01                       | 0.001          | 1.92                    | 8.37                     |
| Group 2                                                  | 5.52                       | 0.001          | 2.63                    | 11.59                    |
| Group 3                                                  | 1.00                       | ---            | ---                     | ---                      |
| Group 4                                                  | 5.15                       | 0.001          | 2.55                    | 10.42                    |
| UFOV at Randomization                                    | 1.01                       | 0.001          | 1.01                    | 1.02                     |
| Separate Analysis in the $\geq 65$ Age Stratum (N = 207) |                            |                |                         |                          |
| Group 1                                                  | 3.68                       | 0.018          | 1.25                    | 10.78                    |
| Group 2                                                  | 5.52                       | 0.002          | 1.85                    | 16.47                    |
| Group 3                                                  | 1.00                       | ---            | ---                     | ---                      |
| Group 4                                                  | 5.14                       | 0.002          | 1.80                    | 14.71                    |
| UFOV at Randomization                                    | 1.01                       | 0.001          | 1.01                    | 1.01                     |
| Separate Analysis in the 50-64 Age Stratum (N = 409)     |                            |                |                         |                          |
| Group 1                                                  | 5.30                       | 0.002          | 1.86                    | 15.08                    |
| Group 2                                                  | 6.91                       | 0.001          | 2.41                    | 19.84                    |
| Group 3                                                  | 1.00                       | ---            | ---                     | ---                      |
| Group 4                                                  | 6.00                       | 0.001          | 2.23                    | 16.15                    |
| UFOV at Randomization                                    | 1.02                       | 0.002          | 1.01                    | 1.02                     |

Key: Group 1 = on-site *Road Tour* without boosters; Group 2 = on-site *Road Tour* with boosters; Group 3 = on-site attention control; and, Group 4 = at-home *Road Tour*.

1  
2  
3  
4  
5  
6  
7  
8  
9  
10  
11  
12  
13  
14  
15  
16  
17  
18  
19  
20  
21  
22  
23  
24  
25  
26  
27  
28  
29  
30  
31  
32  
33  
34  
35  
36  
37  
38  
39  
40  
41  
42  
43  
44  
45  
46  
47  
48  
49  
50  
51  
52  
53  
54  
55  
56  
57  
58  
59  
60

For peer review only

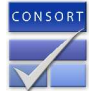

## CONSORT 2010 checklist of information to include when reporting a randomised trial\*

| Section/Topic                    | Item No | Checklist item                                                                                                                                                                              | Reported on page No |
|----------------------------------|---------|---------------------------------------------------------------------------------------------------------------------------------------------------------------------------------------------|---------------------|
| <b>Title and abstract</b>        |         |                                                                                                                                                                                             |                     |
|                                  | 1a      | Identification as a randomised trial in the title                                                                                                                                           | 1                   |
|                                  | 1b      | Structured summary of trial design, methods, results, and conclusions (for specific guidance see CONSORT for abstracts)                                                                     | 2-3                 |
| <b>Introduction</b>              |         |                                                                                                                                                                                             |                     |
| Background and objectives        | 2a      | Scientific background and explanation of rationale                                                                                                                                          | 6-8                 |
|                                  | 2b      | Specific objectives or hypotheses                                                                                                                                                           | 8                   |
| <b>Methods</b>                   |         |                                                                                                                                                                                             |                     |
| Trial design                     | 3a      | Description of trial design (such as parallel, factorial) including allocation ratio                                                                                                        | 7-8                 |
|                                  | 3b      | Important changes to methods after trial commencement (such as eligibility criteria), with reasons                                                                                          | na                  |
| Participants                     | 4a      | Eligibility criteria for participants                                                                                                                                                       | 9-10                |
|                                  | 4b      | Settings and locations where the data were collected                                                                                                                                        | 8                   |
| Interventions                    | 5       | The interventions for each group with sufficient details to allow replication, including how and when they were actually administered                                                       | 8, 11-12            |
| Outcomes                         | 6a      | Completely defined pre-specified primary and secondary outcome measures, including how and when they were assessed                                                                          | 10-11               |
|                                  | 6b      | Any changes to trial outcomes after the trial commenced, with reasons                                                                                                                       | na                  |
| Sample size                      | 7a      | How sample size was determined                                                                                                                                                              | 8                   |
|                                  | 7b      | When applicable, explanation of any interim analyses and stopping guidelines                                                                                                                | na                  |
| <b>Randomisation:</b>            |         |                                                                                                                                                                                             |                     |
| Sequence generation              | 8a      | Method used to generate the random allocation sequence                                                                                                                                      | 10                  |
|                                  | 8b      | Type of randomisation; details of any restriction (such as blocking and block size)                                                                                                         | 10                  |
| Allocation concealment mechanism | 9       | Mechanism used to implement the random allocation sequence (such as sequentially numbered containers), describing any steps taken to conceal the sequence until interventions were assigned | 10                  |
| Implementation                   | 10      | Who generated the random allocation sequence, who enrolled participants, and who assigned participants to interventions                                                                     | 10                  |
| Blinding                         | 11a     | If done, who was blinded after assignment to interventions (for example, participants, care providers, those                                                                                | 10                  |

|                                                      |     |                                                                                                                                                   |           |
|------------------------------------------------------|-----|---------------------------------------------------------------------------------------------------------------------------------------------------|-----------|
|                                                      |     | assessing outcomes) and how                                                                                                                       |           |
|                                                      | 11b | If relevant, description of the similarity of interventions                                                                                       | 8, 10-11  |
| Statistical methods                                  | 12a | Statistical methods used to compare groups for primary and secondary outcomes                                                                     | 12-13     |
|                                                      | 12b | Methods for additional analyses, such as subgroup analyses and adjusted analyses                                                                  | 12-13     |
| <b>Results</b>                                       |     |                                                                                                                                                   |           |
| Participant flow (a diagram is strongly recommended) | 13a | For each group, the numbers of participants who were randomly assigned, received intended treatment, and were analysed for the primary outcome    | 26        |
|                                                      | 13b | For each group, losses and exclusions after randomisation, together with reasons                                                                  | 26        |
| Recruitment                                          | 14a | Dates defining the periods of recruitment and follow-up                                                                                           | 8         |
|                                                      | 14b | Why the trial ended or was stopped                                                                                                                | na        |
| Baseline data                                        | 15  | A table showing baseline demographic and clinical characteristics for each group                                                                  | 28        |
| Numbers analysed                                     | 16  | For each group, number of participants (denominator) included in each analysis and whether the analysis was by original assigned groups           | 26        |
| Outcomes and estimation                              | 17a | For each primary and secondary outcome, results for each group, and the estimated effect size and its precision (such as 95% confidence interval) | 15-16, 30 |
|                                                      | 17b | For binary outcomes, presentation of both absolute and relative effect sizes is recommended                                                       | 15-16, 30 |
| Ancillary analyses                                   | 18  | Results of any other analyses performed, including subgroup analyses and adjusted analyses, distinguishing pre-specified from exploratory         | 14-15     |
| Harms                                                | 19  | All important harms or unintended effects in each group (for specific guidance see CONSORT for harms)                                             | na        |
| <b>Discussion</b>                                    |     |                                                                                                                                                   |           |
| Limitations                                          | 20  | Trial limitations, addressing sources of potential bias, imprecision, and, if relevant, multiplicity of analyses                                  | 4-5       |
| Generalisability                                     | 21  | Generalisability (external validity, applicability) of the trial findings                                                                         | 4-5       |
| Interpretation                                       | 22  | Interpretation consistent with results, balancing benefits and harms, and considering other relevant evidence                                     | 16-17     |
| <b>Other information</b>                             |     |                                                                                                                                                   |           |
| Registration                                         | 23  | Registration number and name of trial registry                                                                                                    | 3         |
| Protocol                                             | 24  | Where the full trial protocol can be accessed, if available                                                                                       | na        |
| Funding                                              | 25  | Sources of funding and other support (such as supply of drugs), role of funders                                                                   | 18        |

\*We strongly recommend reading this statement in conjunction with the CONSORT 2010 Explanation and Elaboration for important clarifications on all the items. If relevant, we also recommend reading CONSORT extensions for cluster randomised trials, non-inferiority and equivalence trials, non-pharmacological treatments, herbal interventions, and pragmatic trials. Additional extensions are forthcoming: for those and for up to date references relevant to this checklist, see [www.consort-statement.org](http://www.consort-statement.org).

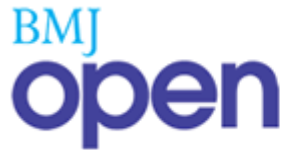

**Post-training results from a randomized controlled trial to improve cognitive functioning in older adults: the Iowa Healthy and Active Minds Study**

|                                 |                                                                                                                                                                                                                                                                                                                                                                                                                                                                                                                                           |
|---------------------------------|-------------------------------------------------------------------------------------------------------------------------------------------------------------------------------------------------------------------------------------------------------------------------------------------------------------------------------------------------------------------------------------------------------------------------------------------------------------------------------------------------------------------------------------------|
| Journal:                        | <i>BMJ Open</i>                                                                                                                                                                                                                                                                                                                                                                                                                                                                                                                           |
| Manuscript ID:                  | bmjopen-2011-000225.R1                                                                                                                                                                                                                                                                                                                                                                                                                                                                                                                    |
| Article Type:                   | Research                                                                                                                                                                                                                                                                                                                                                                                                                                                                                                                                  |
| Date Submitted by the Author:   | 02-Aug-2011                                                                                                                                                                                                                                                                                                                                                                                                                                                                                                                               |
| Complete List of Authors:       | Wolinsky, Fredric; University of Iowa, Health Management and Policy<br>Vander Weg, Mark; University of Iowa, Medicine<br>Howren, M. Bryant; University of Iowa, Medicine<br>Jones, Michael; University of Iowa, Biostatistics<br>Martin, Rene; University of Iowa, Nursing<br>Luger, Tana; University of Iowa, Psychology<br>Duff, Kevin; University of Utah, Neurology<br>Goerdts, Chris; University of Iowa, Medicine<br>Wolfe, Steven; University of Iowa, Medicine<br>Dotson, Megan; University of Iowa, Health Management and Policy |
| <b>Primary Subject Heading</b>: | Geriatric medicine                                                                                                                                                                                                                                                                                                                                                                                                                                                                                                                        |
| Keywords:                       | GERIATRIC MEDICINE, Old age psychiatry < PSYCHIATRY, PUBLIC HEALTH, Clinical trials < THERAPEUTICS                                                                                                                                                                                                                                                                                                                                                                                                                                        |
|                                 |                                                                                                                                                                                                                                                                                                                                                                                                                                                                                                                                           |

SCHOLARONE™  
Manuscripts

1  
2  
3 **Post-training results from a randomized controlled trial to improve cognitive**  
4  
5 **functioning in older adults:the Iowa Healthy and Active Minds Study**  
6  
7  
8  
9

10  
11  
12  
13  
14  
15  
16  
17  
18  
19 Fredric D. Wolinsky  
20 Mark W. Vander Weg  
21 M. Bryant Howren  
22 Michael P. Jones  
23 Rene Martin  
24 Tana M. Luger  
25 Kevin Duff  
26 Christopher Goerd  
27 Steven Wolfe  
28 Megan M. Dotson  
29  
30  
31  
32  
33  
34  
35  
36  
37  
38  
39  
40

41 Prepared for Re-Submission to *BMJ Open*  
42 Words in Abstract: 300  
43 Words in Text:5,241  
44 References: 39  
45 Figures: 2  
46 Tables: 4  
47  
48  
49

50 August 1, 2011  
51  
52  
53  
54

55 Running Head: Post-training results from the IHAMS trial  
56  
57  
58  
59  
60

## Abstract

**Objectives:** The Iowa Healthy and Active Minds Study (IHAMS) is a four-arm, randomized controlled trial of a visual processing speed training program (*Road Tour*). This article presents the post-training results for the primary outcome.

**Design:** Within two age strata (50-64 vs.  $\geq 65$ ), 681 men and women attending general internal and family medicine clinics were randomized to four training groups: (1) a supervised, on-site, standard (10-hour) dose of *Road Tour* training; (2) a supervised, on-site, standard dose of *Road Tour* training with 4 hours of subsequent booster training scheduled to occur at 11-months post-randomization; (3) a supervised, on-site, standard dose of attention control training; and, (4) a self-administered, at-home, standard dose of *Road Tour* training. The primary outcome was the Useful Field of View (UFOV). Three intent-to-treat analyses were conducted, including the primary analysis with (a) multiple linear regression models of composite UFOV scores using Blomrank transformations, and secondary analyses with (b) general linear mixed effects models, and (c) multiple logistic regression models among the 620 participants (91%) with complete data.

**Results:** In the multiple linear regression analyses of the Blom rank transformed UFOV composite at post-training for both age strata, random assignment to any *Road Tour* training group vs. the attention control group was significant ( $p < .001$ ), with an effect size of -0.558 (adjusted for the Blom rank transformed UFOV test at randomization). Similar results were obtained for each *Road Tour* group and within each age-stratum, as well as in the general linear and multiple logistic regression models.



1  
2  
3  
4  
5  
6  
7  
8  
9  
10  
11  
12  
13  
14  
15  
16  
17  
18  
19  
20  
21  
22  
23  
24  
25  
26  
27  
28  
29  
30  
31  
32  
33  
34  
35  
36  
37  
38  
39  
40  
41  
42  
43  
44  
45  
46  
47  
48  
49  
50  
51  
52  
53  
54  
55  
56  
57  
58  
59  
60

Conclusion:A 10-hour dose of *Road Tour* training resulted in medium-sized post-training improvements in visual processing speed. *Road Tour* was equally effective whether administered under laboratory supervision or self-administered in the patient's home, and for participants in both age strata (50-64 vs.  $\geq 65$ ).

Clinical Trial Registration Number: NCT01165463.

For peer review only

## Article Summary

### Article Focus:

- Normative age-related declines in cognitive functioning leave a pressing need to identify efficient and effective training interventions for older adults.
- IHAMS is a four-arm RCT of three modes of delivering a computerized visual speed of processing intervention vs. an attention control group.

### Key Messages:

- IHAMS is the first RCT to evaluate the efficacy and effectiveness of *Road Tour*, a second-generation computerized visual speed of processing intervention.
- Statistically significant medium-sized post-training improvements in visual processing speed were observed regardless of delivery method or age strata.

### Strengths and Limitations of This Study:

- Strengths: this RCT uses a large sample of men and women  $\geq 50$  years old and overcomes four of the five important limitations (exclusion of 50-64 year olds, use of a no-contact control group, adherence-conditioned assignment to booster training, and reliance on a supervised cognitive training program) of a previous multi-site trial.
- Limitations: the sample was drawn from just one family care center in which minorities were underrepresented, participants had to have a home computer and internet access, and data on the primary outcome were available only at randomization and post-training.

## Introduction

It is well established that age-related cognitive decline is a common, normal part of the aging process that occurs across many cognitive functions including memory, orientation, attention, abstract thinking, and perception [1-4]. These age-related cognitive changes can be viewed as the result of physical, behavioral, and environmental changes that combine to promote negative brain plasticity and degradations in functioning [5]. Fortunately, this capacity for physical and functional brain change across the lifespan is bi-directional [5,6]. Indeed, just as brain plasticity can lead towards degradation in cognitive functioning with age, this same plasticity process can also be used to strengthen cognitive abilities [7-9]. This is especially important given recent evidence demonstrating that these age-related declines commence as early as age 28 and then continue in a linear fashion throughout the remainder of the life course [9].

Many training programs have been developed to help mitigate these age-related cognitive functioning declines. Although the gains associated with most earlier cognitive training interventions appeared to be highly task- and context-specific, more recent developments have demonstrated that improving the coordination of executive skills can transfer beyond the testing environment [7]. These often involve complex video games, task-switching paradigms, or divided attention tasks because these training platforms provide a carefully controlled and well-structured environment. Some of these successful interventions have focused on improving visual information processing

1  
2  
3 speed, which is not surprising given the considerable evidence that supports the role of  
4  
5 processing speed in age-related cognitive decline [10-12].  
6  
7

8 Perhaps the most extensively evaluated intervention that targets improving visual  
9  
10 processing speed is that developed by Ball and Roenker [4,13,14]. Their program trains  
11  
12 users to improve the speed and accuracy with which they identify and locate visual  
13  
14 information using a divided attention format. Over time, the difficulty and complexity of  
15  
16 each task is systematically increased as users attain specified performance criteria.  
17  
18 Manipulations to increase difficulty include decreasing visual stimuli duration, adding  
19  
20 visual or auditory distracters, increasing similarity between target and distracter stimuli,  
21  
22 and presenting visual targets over a broader spatial expanse. The basic tasks,  
23  
24 however, are always the same—central discrimination and peripheral target location.  
25  
26 Substantial evidence from the USA NIH-funded multi-site randomized controlled trial  
27  
28 (RCT) known as ACTIVE (Advanced Cognitive Training for Vital Elderly) has shown the  
29  
30 efficacy of Ball and Roenker's visual processing speed intervention on both immediate  
31  
32 and distal cognitive functioning, as well as on subsequent health outcomes [15-24].  
33  
34  
35  
36  
37

38 Posit Science Corporation (San Francisco, California, USA) acquired the rights to  
39  
40 Ball and Roenker's visual speed of processing training program in 2007 [4,13,14].  
41  
42 While all of the original tasks were maintained, the delivery platform was modified to be  
43  
44 user-friendly and self-administered. Gaming elements were also added to improve user  
45  
46 engagement and enhance compliance. The resulting second-generation computerized  
47  
48 visual speed of processing training program is known as *Road Tour*, and has been  
49  
50 commercially available since 2009 as part of the *Insight*<sup>tm</sup> visual processing speed suite  
51  
52 (which includes four other visual training programs known as *Bird Safari*, *Jewel Diver*,  
53  
54  
55  
56  
57  
58  
59  
60

1  
2  
3 *Master Gardener, and Sweep Seeker*), or as part of the *DriveSharp<sup>tm</sup>* driving suite (which  
4 also includes *Jewel Diver* and *Sweep Seeker*) (<http://www.positscience.com/our-products>).  
5  
6  
7

8 We designed the Iowa Healthy and Active Minds Study (IHAMS) to evaluate the  
9 efficacy and effectiveness of *Road Tour*. IHAMS is a four-group parallel RCT  
10 (NCT01165463) whose protocol has been described in detail elsewhere [25]. In this  
11 article we report on the post-training (6-8 weeks post-randomization) results for the  
12 primary outcome. Because no standard booster training occurred by this time, and  
13 because supplemental training beyond 10 hours in the at-home group should have been  
14 minimal, we hypothesize that participants randomized to any of the three *Road Tour*  
15 training groups (no booster training subsequently scheduled, booster training scheduled  
16 to occur at 11 months post-randomization, and at-home training with self-dosing allowed  
17 after 6-8 weeks post-randomization) should have significantly and similarly greater  
18 improvements in visual processing speed immediately after training than the attention  
19 control group.  
20  
21  
22  
23  
24  
25  
26  
27  
28  
29  
30  
31  
32  
33  
34  
35

### 36 **Methods and Analysis**

37  
38 Overview. Figure 1 shows the IHAMS study design and participant recruitment  
39 results. IHAMS used a 3:3:4:4 allocation ratio and block randomization separately  
40 within two age-strata (50-64 [mean = 57.2, standard deviation = 4.2, range = 50-64] vs. ≥  
41 65 [mean = 71.4, standard deviation = 5.7, range = 65-87]). A total of 681 participants  
42 were randomized to one of the following groups: (1) 10 hours (a single two-hour  
43 session each week over the first 5-6 weeks) of supervised on-site training using *Road*  
44 *Tour* (N = 154), (2) 10 hours of supervised on-site training using *Road Tour* plus 4 hours  
45 of booster training at 11 months post-randomization (N = 148), (3) 10 hours of  
46  
47  
48  
49  
50  
51  
52  
53  
54  
55  
56  
57  
58  
59  
60

1  
2  
3 supervised on-site attention control using computerized crossword puzzles (*Boatload of*  
4 *Crosswords*, Boatload Puzzles, LLC, Yorktown Heights, New York, USA) (N = 188), or  
5  
6 (4) self-administered at-home training using *Road Tour* for 10 hours or more (N = 191),  
7  
8 with the option to continue using *Road Tour* thereafter but not to use any of the four  
9  
10 other training programs from the *Insight* software suite until the study was over. Post-  
11  
12 training assessments occurred at 6-8 weeks post-randomization, and complete baseline  
13  
14 and post-training data were obtained for 620 participants (91%). One-year post-  
15  
16 randomization assessments are scheduled to be completed by late November 2011.  
17  
18 IHAMS was sized to provide  $\geq 80\%$  power to detect an effect size of 0.25 in the primary  
19  
20 outcome at one-year post-randomization with  $\alpha = 0.05$ .  
21  
22  
23  
24  
25

26  
27 Sampling Frame. We included all patients attending either the general internal or  
28  
29 family medicine clinics of the University of Iowa's Family Care Center (FCC) in the  
30  
31 IHAMS sampling frame. The electronic medical record was used for initially selecting  
32  
33 potentially eligible participants. The initial inclusion criteria were: (1) age  $\geq 50$  years  
34  
35 old, (2)  $\geq 2$  visits to a primary care physician in the FCC in the past year, and (3) the  
36  
37 absence of diagnostic codes for Alzheimer's or Picks' disease, arteriosclerotic dementia,  
38  
39 other senile or pre-senile dementia, dementia due to alcohol or drugs, amnesic  
40  
41 syndrome, or dementia due to other organic conditions. A total of 5,743 potentially  
42  
43 eligible patients were identified. Weekly random replicates of 100-250 of them were  
44  
45 sent a letter describing the study and asking them to telephone the project office and  
46  
47 indicate whether or not they were interested in participating.  
48  
49  
50  
51

52  
53 Telephone Screening. We attempted to further screen all potentially eligible  
54  
55 patients, but could not reach 1,627. Of the 4,116 remaining potentially eligible patients,  
56  
57  
58  
59  
60

1  
2  
3 2,079 declined to participate, and 966 had not yet been mailed their letter describing the  
4  
5 study by the time that study enrollment was closed, leaving 1,071 potentially eligible  
6  
7 patients. We conducted brief screening interviews to identify who among them met any  
8  
9 of the following exclusion criteria: (1) significant cognitive impairment based on  $\geq 3$   
10  
11 errors on a 10-item mental status exam (N = 15)[26], (2) significant self-reported  
12  
13 uncorrected visual acuity problems (N = 63), (3) not having a personal computer with a  
14  
15 CD-ROM in the home (N = 303), (4) not having internet access (N = 8), or (5) having  
16  
17 previously used a computerized program for improving cognitive function (N = 1). This  
18  
19 resulted in the exclusion of 390 potential participants.  
20  
21  
22  
23

24  
25 Informed Consent and Baseline Interviews. After completing the screening  
26  
27 interview, eligible patients were scheduled for a two-hour visit to our laboratory where  
28  
29 written informed consent was obtained for the 681 participants who were enrolled  
30  
31 between March 22 and November 16, 2010. The 681 enrollees were then administered  
32  
33 their baseline (randomization) interviews by trained research assistants using computer-  
34  
35 assisted interviewing protocols. Immediately afterwards each participant was  
36  
37 randomized to one of the four study groups.  
38  
39

40  
41 Randomization Procedure. The study biostatistician (MPJ) determined the order  
42  
43 of assignments using a computer-generated list of random numbers and a 3:3:4:4  
44  
45 allocation ratio, because the first two groups can be pooled for some analyses. Sample  
46  
47 size was based on *a priori* power calculations to achieve 80% power at  $\alpha = 0.05$  for  
48  
49 a two-tailed test with a 0.25 effect size between each training group and the attention  
50  
51 control group at one-year post-randomization. Block randomization was used to  
52  
53 maintain balance on the two age-strata (50-64 and  $\geq 65$ ). Block sizes of 4, 8, and 12  
54  
55  
56  
57  
58  
59  
60

1  
2  
3 were randomly varied. The assignment for each participant's ID number was recorded  
4  
5 on a participant letter and then sealed in an opaque envelope with only the ID number  
6  
7 visible. Two age-stratum specific boxes containing the assignment envelopes were  
8  
9 stored in a locked cabinet in the Project Coordinator's office. The Project Coordinator  
10  
11 (MMD) had the responsibility of unsealing the envelope (from the appropriate age-  
12  
13 stratum box) and revealing each participant's group assignment.  
14  
15

16  
17 Cognitive Processing Speed Outcomes. The six neuropsychological  
18  
19 assessments, which were all administered at randomization and are being administered  
20  
21 at one-year post-randomization, are: (1) the UFOV PC mouse version [27]; (2) the  
22  
23 Symbol Digit Modalities Test (SDMT) [28]; (3) the Trail Making A and B Tests (TMT)  
24  
25 [29]; (4) the Controlled Oral Word Association Test (COWAT) [30]; (5) the Digit  
26  
27 Vigilance Test (DVT) [31]; and, (6) the Stroop Color and Word Test (Stroop) [32]. The  
28  
29 UFOV test is the primary outcome and earlier versions of it have been used in most  
30  
31 prior visual speed of processing studies, including ACTIVE. It was also administered at  
32  
33 post-training (6-8 weeks post-baseline). The UFOV includes three subtests—stimulus  
34  
35 identification, divided attention, and selective attention—each of which is scored from  
36  
37 17-500 milliseconds (ms) reflecting the shortest exposure time at which the participant  
38  
39 could correctly perform each subtest 75% of the time, with a composite ms outcome  
40  
41 score ranging from 51-1500 ms. Consistent with the main reports from the ACTIVE trial  
42  
43 [16, 17], we used Blom rank transformations [33] on the UFOV composite scores at  
44  
45 randomization and post-training to normalize the distributions for the multiple linear  
46  
47 regression and general linear mixed effects models. The Blom rank transformations  
48  
49 resulted in means of zero and standard deviations of unity, and more nearly Gaussian  
50  
51  
52  
53  
54  
55  
56  
57  
58  
59  
60



1  
2  
3 distributions. Blom transformations are commonly used for distributional normalization  
4  
5 [34], and have been shown to yield the most reliable results among a variety of  
6  
7 alternatives for violations of the distributional assumptions of both multiple linear  
8  
9 regression and general linear mixed effects models[35].  
10  
11

12  
13 The SDMT, TMT, COWAT, DVT, and Stroop tests are secondary outcome  
14  
15 measures, but were not administered at post-training due to time constraints. SDMT  
16  
17 captures divided attention and processing speed, and is based on how many of 110  
18  
19 possible digit-symbol pairs were scored as correct pairs by the participant in 90  
20  
21 seconds. TMT assesses visual scanning ability, processing speed, and set-  
22  
23 shifting/executive functioning, and is coded as the number of seconds needed to  
24  
25 correctly complete connecting the number and number-letter sets. COWAT assesses  
26  
27 verbal fluency based on the number of unique words beginning with the letter C (or F or  
28  
29 L in the second and third trials) generated by the participant during 60 seconds, with a  
30  
31 composite score of the number of correct words used across the three letter trials. DVT  
32  
33 assesses sustained attention and psychomotor speed, is performed by crossing out  
34  
35 randomly placed 6's in 59 rows of numbers, and is scored as the error and time totals.  
36  
37 The Stroop assesses processing speed and executive functioning, and is scored as the  
38  
39 correct number of words, colors, and color-words identified in 45 seconds on each  
40  
41 subtest.  
42  
43  
44  
45  
46  
47

48 The Road Tour Training Program. *Road Tour's* basic appearance to the user is  
49  
50 shown in Figure 2a. After clicking on the start button to initiate training, Figure 2b is  
51  
52 shown. Here, both the license plate area and the eight circular locations in the near  
53  
54 orbit surrounding it are empty. The empty license plate is then replaced, as in Figure  
55  
56  
57  
58  
59  
60

1  
2  
3 2c, with the target vehicle, either a car or a truck. Similarly, the eight empty circular  
4  
5 locations surrounding the license plate are then replaced with seven distracter stimuli  
6  
7 (rabbit crossing signs) or the target sign (Route 66). The stimuli (car vs. truck, and  
8  
9 rabbit crossing vs. Route 66 sign) are presented for a specified time and are then  
10  
11 replaced by Figure 2d. The amount of time that Figure 2c remains on the screen before  
12  
13 being replaced by Figure 2d is measured in ms. In Figure 2e, both target vehicles (the  
14  
15 car and truck) are presented in the center of the screen, one of which was previously  
16  
17 shown in Figure 2c as the target vehicle. The user first clicks on the correct target  
18  
19 vehicle (car or truck), and then on the circular location where the correct peripheral  
20  
21 target (Route 66 sign) appeared (Figure 2f). The goal is to improve cognitive  
22  
23 processing speed by progressively reducing the ms of exposure that Figure 2c remains  
24  
25 on the screen with subsequent correct identification of both the stimuli (target car or  
26  
27 truck) and target (Route 66) sign. As the user progresses, three changes occur which  
28  
29 further increase task difficulty: (a) the target visual field expands by progressing  
30  
31 outward from the license plate to add medium and distal orbits, (b) these are  
32  
33 accompanied by an increasing number of distracters to fully populate all three orbits (up  
34  
35 to 47), and (c) the vehicle pairs morph through 9 different stages or pairs to become  
36  
37 more similar and thus more difficult to differentiate.  
38  
39  
40  
41  
42  
43  
44

45 Analysis. First, one-way analysis of variance for selected participant  
46  
47 characteristics, training time, and the six neuropsychological outcomes was conducted.  
48  
49 To assess the effects of *Road Tour* training (vs. attention control training) on the primary  
50  
51 outcome, we used three intent-to-treat analytic approaches, including (a) multiple linear  
52  
53 regression of composite UFOV scores using Blom rank transformations for  
54  
55  
56  
57  
58  
59  
60

1  
2  
3 normalization (the primary analysis specified in the protocol [25]), (b) general linear  
4  
5 mixed effects models using the Blom rank transformations (as a secondary analysis),  
6  
7 and (c) multiple logistic regression analyses of post-training improvements  $\geq 100$   
8  
9 milliseconds in the non-transformed UFOV composite (also as a secondary analysis).  
10  
11 In each approach, our first model involved the single binary contrast of being randomly  
12  
13 assigned to any *Road Tour* training, adjusting for the value of the UFOV composite at  
14  
15 randomization. We then substituted three mutually exclusive binary indicators for the  
16  
17 single binary contrast. These three binary indicators reflect whether the participant was  
18  
19 in the on-site speed of processing intervention without boosters, the on-site speed of  
20  
21 processing intervention with boosters subsequently scheduled to occur at 11 months  
22  
23 post-randomization, or the at-home speed of processing group vs. those in the on-site  
24  
25 crossword puzzle (attention control) group as the reference or omitted category. We  
26  
27 then estimated both the first and second model separately within each age stratum.  
28  
29  
30  
31  
32  
33

## 34 Results

35  
36 Baseline Group Comparisons. Table 1 compares the four training groups on  
37  
38 selected participant characteristics (including the self-rated health and change in self-  
39  
40 rated health from one-year ago items from the SF-36 [36]), amount of training (in  
41  
42 minutes) received, and the five secondary outcome neuropsychological tests at  
43  
44 randomization. No statistically significant differences were found for any of the  
45  
46 participant characteristics. Statistically significant differences were observed, however,  
47  
48 on the amount of training received. The attention control group received the most  
49  
50 training, while the at-home *Road Tour* training group received the least (despite  
51  
52 instructions to the contrary, 37 of them used one or more of the four other programs in  
53  
54  
55  
56  
57  
58  
59  
60

1  
2  
3 the *Insight* suite during training, but only 12 did so for more than 14 minutes). This is  
4 not surprising given the efforts to schedule the five, two-hour training sessions for all  
5 participants in the three on-site training groups. Moreover, on-site *Road Tour*  
6 participants were allowed to stop their training once they had completed all 81 of the  
7 available exercise sets, which occurred about 5% of the time. Finally, although *Road*  
8 *Tour* directly monitors training in minutes based on actual program usage, participant  
9 training in the attention control group was monitored by project staff based on the  
10 completion of two-hour training sessions.  
11  
12  
13  
14  
15  
16  
17  
18  
19  
20  
21

22 Statistically significant differences between the training groups were also  
23 observed for the SDMT, TMT (A and B), and the word and color sub-tests of the Stroop.  
24 In all cases, the attention control group demonstrated the lowest level of performance.  
25 These differences, however, were modest in the absolute, although *post-*  
26 *hoc* comparisons using Dunnett tests found 8 of the 15 group level contrasts involving the  
27 attention control group to be statistically significant. The attention control group had  
28 significantly lower performance than (a) all three training groups on the TMT-A, (b) the  
29 on-site training group without subsequent scheduled boosters on the SDMT, TMT-B,  
30 and the Stroop color subtest, and (c) the on-site training group without subsequent  
31 scheduled boosters and the at-home training group on the Stroop word subtest.  
32 Therefore, we will adjust for these differences in all subsequent analyses by including  
33 the value of the outcome measure at randomization.  
34  
35  
36  
37  
38  
39  
40  
41  
42  
43  
44  
45  
46  
47  
48  
49

50 Table 2 compares the four training groups on the three UFOV subtests—stimulus  
51 identification, divided attention, and selective attention—as well as the UFOV composite  
52 and Blom rank transformed UFOV composites at randomization and at post-training.  
53  
54  
55  
56  
57  
58  
59  
60

1  
2  
3 No statistically significant differences were observed on the three UFOV subtests, the  
4 UFOV composite, or the Blom rank transformed UFOV composite scores at  
5 randomization, although the attention control group had the slowest performance in all  
6 comparisons. At post-training, however, statistically significant differences were  
7 observed on the three UFOV subtests, on the UFOV composite score, and on the Blom  
8 rank transformed UFOV composite score. Moreover, Dunnett tests indicated that all of  
9 the training group comparisons involving the attention control group were statistically  
10 significant as well.  
11  
12  
13  
14  
15  
16  
17  
18  
19  
20  
21

22 Multiple Linear Regression. The first panel of Table 3 contains the results from  
23 the multiple linear regression analysis of the Blom rank transformed UFOV composite  
24 scores at post-training predicted by the Blom rank transformed UFOV composite scores  
25 at randomization and the single binary contrast of being randomly assigned to any *Road*  
26 *Tour* training for all 620 IHAMS participants with complete data. The second and third  
27 panels contain the results from similar analyses stratified on age (50-64 vs.  $\geq 65$ ).  
28 Because the Blom rank transformed UFOV composite scores have been normalized to  
29 have a mean of zero and a standard deviation of unity, the unstandardized *b*  
30 coefficients shown may be directly interpreted as effect size estimates. The effect sizes  
31 are -0.558 in the pooled analysis, -0.479 for the  $\geq 65$  age stratum, and -0.626 for the 50-  
32 64 age stratum, with all three *p* values  $< 0.001$ . Although the magnitude of the effect  
33 sizes appear larger in the younger age stratum than in the older age stratum, note that  
34 all effect sizes are within the 95% confidence intervals of each other, and are thus  
35 functionally comparable. This was verified by adding a binary marker for age strata and  
36  
37  
38  
39  
40  
41  
42  
43  
44  
45  
46  
47  
48  
49  
50  
51  
52  
53  
54  
55  
56  
57  
58  
59  
60

1  
2  
3 its interaction with having any *Road Tour* training to the model, neither of which were  
4 statistically significant.  
5  
6

7  
8 Table 4 contains the results from the multiple linear regression analysis of the  
9 Blom rank transformed UFOV composite scores when the single binary contrast of  
10 being randomly assigned to any *Road Tour* training is replaced by the set of three  
11 binary indicators reflecting each specific *Road Tour* training group. As in Table 3, the  
12 first panel of Table 4 contains the results for all 620 IHAMS participants with complete  
13 data, while the second and third panels contain the results from analyses stratified on  
14 age (50-64 vs.  $\geq 65$ ). Also as in Table 3, all of the coefficients shown may be directly  
15 interpreted as effect size estimates, and all have  $p$  values  $< 0.001$ . The effect sizes in  
16 Table 4 for each of the *Road Tour* training groups are very similar to those shown in  
17 Table 3 for the pooled markers. Here, too, the magnitude of the effect sizes for each  
18 training group appears larger in the younger age stratum than in the older age stratum,  
19 but once again all effect sizes are within the 95% confidence intervals of each other,  
20 and are thus functionally comparable. Similarly, while the effect sizes within panels  
21 appears smallest for the on-site training group not scheduled to receive subsequent  
22 booster training, only for the younger age stratum do these lie outside of each other's  
23 95% confidence intervals, and then only when compared to the at-home training  
24 group. Taken together, the multiple linear regression results contained in Tables 3 and 4  
25 support our hypothesis for the post-training effects in all respects.  
26  
27  
28  
29  
30  
31  
32  
33  
34  
35  
36  
37  
38  
39  
40  
41  
42  
43  
44  
45  
46  
47  
48  
49

50 General Linear Models with Mixed Effects. We used general linear models with  
51 mixed effects as a secondary analytic approach to adjust for the correlated errors within  
52 participants that may arise from the repeated UFOV measurement (which the primary  
53  
54  
55  
56  
57  
58  
59  
60

1  
2  
3 multiple linear regression analyses do not address [37]). The results from the general  
4 linear mixed effects model for the effect of being randomly assigned to any *Road*  
5 *Tour* training for all 620 IHAMS participants with complete data revealed (data not  
6 shown) a statistically significant ( $p < 0.001$ ) interaction between the Blom rank  
7 transformed outcome and any *Road Tour* training reflecting a standardized mean  
8 difference (effect size) of -0.430. When this model was run separately within age strata,  
9 the standardized mean difference was -0.378 ( $p < 0.001$ ) in the older stratum and -0.490  
10 ( $p < 0.001$ ) in the younger stratum. Once again, although these effects sizes appear  
11 larger in the younger stratum, these differences were not statistically significant, as  
12 indicated when the binary marker for age strata and its interaction with any *Road Tour*  
13 training (a group-by-time-by-age-stratum interaction) was added to the general linear  
14 model for all IHAMS participants.

15  
16  
17  
18  
19  
20  
21  
22  
23  
24  
25  
26  
27  
28  
29  
30  
31  
32 When the single binary contrast of being randomly assigned to any *Road Tour*  
33 training was replaced by the set of three binary indicators reflecting each specific *Road*  
34 *Tour* training group for all IHAMS participants, standardized mean differences  
35 (compared to the attention control group) of -0.356, -0.448, and -0.475 were obtained  
36 for the *Road Tour* without subsequently scheduled booster training, *Road Tour* with  
37 subsequently scheduled booster training, and at-home *Road Tour* training groups, all of  
38 which were statistically significant ( $p < 0.001$ ). Similar results were obtained when this  
39 general linear model was estimated within age strata. Once again, no group-by-time-  
40 by-age-stratum interactions were observed in the general linear mixed effects model for  
41 all IHAMS participants. Thus, when taken together, the general linear mixed effects  
42 modeling results also support our hypothesis for the post-training effects in all respects.

1  
2  
3 Multiple Logistic Regression. The multiple logistic regression analysis was  
4  
5 conducted to ensure that both analyses of the Blom rank transformed UFOV  
6  
7 composites were not statistical artifacts of the normalization algorithm. An effect  
8  
9 threshold of improvements  $\geq 100$  ms was chosen because it represents an effect size of 0.55  
10  
11 based on the non-transformed baseline UFOV composite, which is equivalent to that observed  
12  
13 in Table 3 for the pooled analysis of assignment to any *Road Tour* training in the overall IHAMS  
14  
15 sample. The adjusted odds ratio (AOR) for being randomized to any *Road Tour* training  
16  
17 group on achieving a post-training improvement in the UFOV test  $\geq 100$  ms was 4.85 ( $p <$   
18  
19 .001). The absolute improvement effect was 12.2% (34.3% of *Road Tour* subjects  
20  
21 improved  $\geq 100$  ms vs. 23.1% of attention control subjects). This simple model fit the  
22  
23 data extremely well (*Area under the Curve* [AUC] = 0.92). We then replaced the single  
24  
25 binary marker with the three indicators for each of the *Road Tour* training groups, and  
26  
27 found that while the three *Road Tour* training groups' AORs varied from 4.01 to 5.52  
28  
29 ( $p$  values  $< .001$ ; AUC = 0.92; absolute improvement effects 10.0% to 12.5%), they all fell  
30  
31 within the others' confidence intervals, reflecting similar effect sizes. Comparable results  
32  
33 were found (not shown) within age strata, although the model for the younger age  
34  
35 stratum fit the data slightly better (AUC = 0.95 vs. AUC = 0.86). Thus, when taken  
36  
37 together, these multiple logistic regression results also confirm support our hypothesis  
38  
39 for the post-training effects in all respects.  
40  
41  
42  
43  
44  
45  
46  
47

### 48 **Conclusion**

49  
50 Gradual cognitive decline is nearly universal and is well-recognized as a normal  
51  
52 part of the aging process. According to Salthouse [38], most age-related cognitive  
53  
54 deteriorations are at least partially attributable to declines in information processing  
55  
56 speed, which affects episodic and working memory, verbal fluency, and reasoning  
57  
58  
59  
60



1  
2  
3 abilities. Previous work, especially the USA NIH-funded multi-site ACTIVE trial has led  
4  
5 to the development of a promising, second-generation computer-based intervention to  
6  
7 improve visual processing speed known as *Road Tour*. We designed IHAMS to assess  
8  
9 the efficacy and effectiveness of *Road Tour*.  
10  
11

12  
13 There are five important aspects of IHAMS that warrant further mention. First,  
14  
15 IHAMS overcomes five major limitations of the previous USA NIH-funded ACTIVE multi-  
16  
17 site RCT, the first three of which we were able to directly evaluate in this article  
18  
19 reporting on the post-training results. In addition to participants 65 years old or older,  
20  
21 IHAMS included 50-64 year olds to determine whether speed of processing training is  
22  
23 efficacious and effective before substantial cognitive decline occurs in the seventh  
24  
25 decade [39]. If speed of processing training is efficacious in this younger cohort,  
26  
27 preventative interventions could focus on improving cognitive functioning before the  
28  
29 rapid age-related declination process even begins. IHAMS also used an attention  
30  
31 control group that was trained on computerized crossword puzzles rather than a no-  
32  
33 contact control group. This allowed us to directly evaluate the potential that placebo  
34  
35 effects cloud the interpretation of the results from ACTIVE [25]. By using *Road Tour*  
36  
37 rather than its predecessor, IHAMS avoids reliance on a supervised training  
38  
39 intervention. This allowed us to directly evaluate whether sending participants home  
40  
41 with the software to use on their own PCs is efficacious, and if so, whether it was as  
42  
43 effective as supervised on-site training, which potentially expands substantially the  
44  
45 ability to implement widespread public health interventions. IHAMS also directly  
46  
47 randomized participants to receive or not receive on-site booster training, as opposed to  
48  
49 the adherence-conditioned assignment to booster training used in ACTIVE. When the  
50  
51  
52  
53  
54  
55  
56  
57  
58  
59  
60

1  
2  
3 one-year follow-up data become available, this will allow us to separate the effects  
4 associated with standard dosing from those derived from standard dosing plus booster  
5 training. IHAMS also included five additional neuropsychological tests assessed at  
6 baseline that will also be assessed at the one-year follow-up as secondary outcomes.  
7  
8 Once the one-year follow-up data become available, this will allow us to assess the  
9 extent to which *Road Tour* effects on the primary outcome transfer to the other cognitive  
10 functions tapped by these neuropsychological tests.  
11  
12  
13  
14  
15  
16  
17  
18

19  
20 The second important aspect of this study involves the training intervention itself.  
21  
22 *Road Tour* is easy to use on any PC (versions for both PC and Apple platforms are  
23 available) at any location. Adherence to training was remarkable, even in the at-home  
24 training group which did not benefit from the support of weekly scheduling contacts.  
25  
26 The targeted standard training dose was just 10 hours, although the mean amount of  
27 time that it was used in the two on-site training groups was only 7.8 hours spread over a  
28 five-week period. The two-hour training sessions were extremely well-tolerated, and no  
29 discomfort of any kind was reported by any participant during delivery of the standard  
30 training dose. In sum, the ability to readily implement *Road Tour* training in widespread  
31 public health interventions is extremely promising from a logistics perspective.  
32  
33  
34  
35  
36  
37  
38  
39  
40  
41  
42

43  
44 The demonstrated efficacy of *Road Tour* to improve UFOV scores is the third  
45 important aspect of this study that warrants further mention. Three different analytic  
46 approaches—multiple linear regression, general linear mixed effects, and multiple  
47 logistic regression models—all substantially supported our hypothesis for the post-  
48 training effects in all respects. The primary analytic approach was the pooled multiple  
49 linear regression of the Blom rank transformed UFOV composite at post-training. When  
50  
51  
52  
53  
54  
55  
56  
57  
58  
59  
60

1  
2  
3 these analyses were done pooling both age strata, the regression coefficient for random  
4 assignment to any *Road Tour* training group vs. the attention control group was  
5 statistically significant ( $p < .001$ ) with an effect size of -0.558 (adjusted for the Blom rank  
6 transformed UFOV test at randomization). Similar results were also obtained when  
7 comparing each of the three training groups with the attention control group. That this  
8 medium effect size was obtained with an average of less than eight hours of training  
9 suggests that the potential for widespread public health interventions is very promising.

10  
11  
12  
13  
14  
15  
16  
17  
18  
19  
20 Directly comparing the efficacy of *Road Tour* obtained in IHAMS to the speed of  
21 processing training results obtained from a meta-analysis consisting of ACTIVE and five  
22 other visual speed of processing training RCTs with a total enrollment of 907 subjects  
23 followed for varying time lengths [13] is problematic for at least four reasons. First, most  
24 of those RCTs used the touchscreen version of the UFOV which has four subtests and  
25 yields a composite score that ranges between 68 and 2,000 ms, while IHAMS used the  
26 PC mouse version which has only three subtests and yields a composite score that  
27 ranges between 51 and 1,500 ms. Second, most of those RCTs used a no-contact  
28 control group design which added any potential placebo effect to their training effect  
29 estimates. Moreover, IHAMS used an attention control group that was trained using a  
30 computerized crossword puzzle program that may have led to some improvement in  
31 processing speed beyond the potential placebo effect. Third, all of those RCTs used  
32 the predecessor version of the speed of processing software that required supervised,  
33 on-site training. Fourth, IHAMS used less robust mental status and self-reported visual  
34 acuity screening tools than those RCTs for exclusion purposes, which enhanced the  
35 generalizability of IHAMS while biasing its effect size estimates toward the null. That  
36  
37  
38  
39  
40  
41  
42  
43  
44  
45  
46  
47  
48  
49  
50  
51  
52  
53  
54  
55  
56  
57  
58  
59  
60

1  
2  
3 said, the meta-analysis [13] revealed an average effect size estimate of -0.81, which is  
4  
5 somewhat larger than the two-year -0.72 effect size estimated just from ACTIVE.  
6

7  
8 Taking the three differences noted above into consideration, the effect sizes for those  
9  
10 six RCTs are quite comparable to the post-training effect size estimated from our  
11  
12 multiple linear regression model of -0.56 and from our general linear mixed effects  
13  
14 model of -0.43.  
15

16  
17 The fourth important aspect of this study that warrants further mention involves  
18  
19 the comparison of the on-site vs. the at-home training effects. For the two on-site *Road*  
20  
21 *Tour* training groups, the effect size estimates from the multiple linear regression  
22  
23 model were -0.457 and -0.585, while the effect size estimate for the at-home training  
24  
25 group was -0.629. Thus, the effect size was largest for the at-home training group,  
26  
27 although all three estimates are within the others' 95% confidence intervals, reflecting  
28  
29 their comparability. Therefore, the benefits that accrue from *Road Tour* training can be  
30  
31 achieved using a home PC without supervision, which substantially increases the  
32  
33 opportunity to implement speed of processing training in widespread public health  
34  
35 interventions.  
36  
37  
38  
39

40  
41 The final aspect of this study that warrants further mention involves the efficacy  
42  
43 equivalence between the two age strata. Among older adults ( $\geq 65$  years old) the  
44  
45 estimated effect size from the multiple linear regression analysis was -0.479, while it  
46  
47 was -0.626 among younger adults (50-64 years old). Moreover, when an interaction  
48  
49 term was added to the model in the pooled analysis, no statistical difference in these  
50  
51 estimates was observed. This finding of equivalence in the efficacy of *Road*  
52  
53 *Tour* between the age strata is extremely promising because it suggests that  
54  
55  
56  
57  
58  
59  
60

1  
2  
3 preventative interventions could focus on improving cognitive functioning at an earlier  
4 stage of age-related decline.  
5  
6

7  
8 In conclusion, we note that although our study has numerous strengths, it does  
9 have limitations, four of which are worth noting. First, although large, the sample was  
10 drawn from just one family care center in which minorities were underrepresented.  
11  
12 Second, to be eligible, participants had to have a home computer and internet access.  
13  
14 Third, only one of the five training programs included in Posit Science's *Insight* suite  
15 (*Road Tour*) was studied. Finally, only data on the primary outcome were available, and  
16 then only at randomization and post-training. The first two of these limitations constrain  
17 the generalizability of IHAMS somewhat, while the last two leave the issues of potential  
18 benefits from multifaceted training (using all five of the training programs in the *Insight*  
19 suite) and the transferability to the five other neuropsychological outcomes unresolved.  
20  
21  
22  
23  
24  
25  
26  
27  
28  
29  
30  
31  
32  
33  
34  
35  
36  
37  
38  
39  
40  
41  
42  
43  
44  
45  
46  
47  
48  
49  
50  
51  
52  
53  
54  
55  
56  
57  
58  
59  
60

## End Matter

Acknowledgements: The authors acknowledge and applaud the 681 participants from the University of Iowa Family Care Center(FCC) general internal and family medicine clinics. Without their participation and support, this study would not have been possible. The authors also acknowledge the research assistants, work-study students, and other support staff involved in IHAMS.

Funding: This study was supported by US NIH grant RC1 AG-035546 to FDW.

Competing Interests:The *Road Tour* computerized visual speed of processingintervention used in IHAMS is commercially available from Posit Science Corporation (San Francisco, CA, USA).None of the members of the investigative team have any conflicts of interest or commitment involving Posit Science. Specifically, no one on the investigative team will financially profit in any way from the use of *Road Tour*.

Posit Science acquired ownership in October 2007 of Ball and Roenker's [4,13,14] original speed of processing intervention that was used in the multi-site ACTIVE RCT on which FDW was an original co-investigator (at the ACTIVE Indiana University site). In collaboration with Professors Ball and Roenker, Posit Science subsequently developed the second-generation, value-added version of the visual speed of processing intervention known as *Road Tour* and used here in IHAMS. From December 2007 to March 2009, FDW had a limited, part-time consulting arrangement (15 days, total) with Posit Science to support additional analyses of the first five-years of the ACTIVE follow-up data that had not been identified in the original ACTIVE protocols nor funded by the various US NIH grants supporting ACTIVE. This arrangement was

1  
2  
3 approved in advance by the ACTIVE Executive Committee (which included the US NIH  
4 project officers), and was sanctioned by the Provost of the University of Iowa.  
5  
6

7  
8 After terminating this limited, part-time consulting arrangement with Posit  
9 Science, FDW applied in April 2009 for, and was awarded in September 2009 the US  
10 NIH Challenge Grant known as IHAMS. Posit Science provided the 700 copies of *Road*  
11 *Tour* used in IHAMS at no cost or obligation. Furthermore, in its letter of commitment to  
12 IHAMS and the US NIH, Posit Science stated should the results support the efficacy  
13 and effectiveness of *Road Tour*, they will “work with agencies at the federal government  
14 to make the program available for wide-scale implementation at only a fraction of the  
15 current per-user cost.”  
16  
17

18  
19  
20  
21  
22  
23  
24  
25  
26  
27 Ethics Approval: Ethics approval was provided by the University of Iowa  
28 Institutional Review Board (IRB-03; IRB protocol number 200908789), initially approved  
29 on September 12, 2009, and most recently re-approved on May 18, 2011.  
30  
31  
32

33  
34  
35  
36  
37  
38  
39  
40  
41  
42  
43  
44  
45  
46  
47  
48  
49  
50  
51  
52  
53  
54  
55  
56  
57  
58  
59  
60  
Contributors: FDW is the principal investigator on the study, wrote the original  
proposal, supervised the trial, conducted all of the analyses, and drafted the manuscript.  
MWV-W is co-principal investigator on the study, collaborated on the original proposal,  
co-supervised the trial, and reviewed the analyses reported here as well as the  
manuscript itself. MBH is a post-doctoral fellow working on the study, trained all of the  
interviewers, supervised the scoring of the neuropsychological tests, and reviewed the  
manuscript. MPJ is the study biostatistician, devised the randomization protocol,  
reviewed all of the analyses, and reviewed the manuscript. RM is a co-investigator on  
the study, collaborated on the original proposal, supervised preparation of all of the  
ethics, consent, and IRB documents, and reviewed the analyses and the manuscript.

1  
2  
3 TML was a study Research Assistant who assisted with piloting the interview protocol,  
4  
5 conducted randomization interviews, and reviewed the manuscript. KD is the study  
6  
7 neuropsychologist, supervised selection of the neuropsychological tests, reviewed the  
8  
9 psychometric analyses, and reviewed the manuscript. CG is the medical director of the  
10  
11 FCCGeneral Medicine Clinic, participated in subject recruitment, and reviewed the  
12  
13 manuscript. SW is the medical director of the FCC Family Medicine Clinic, participated  
14  
15 in subject recruitment, and reviewed the manuscript. MMD is the Project Coordinator.  
16  
17  
18  
19  
20  
21  
22  
23  
24  
25  
26  
27  
28  
29  
30  
31  
32  
33  
34  
35  
36  
37  
38  
39  
40  
41  
42  
43  
44  
45  
46  
47  
48  
49  
50  
51  
52  
53  
54  
55  
56  
57  
58  
59  
60



## References

1. Birren JE, Woods AM, & Williams MV. Behavioral slowing with age: causes, organization, and consequences of slowing. Pp. 293–308 in Poon LW (ed), *Aging in the 1980s: psychological issues*. Washington, DC: American Psychological Association, 1980.
2. Edwards JD, Wadley VG, Myers RS, Roenker DL, Cissell GM, & Ball KK. Transfer of a speed of processing intervention to near and far cognitive functions. *Gerontol*, 2002;48:329–340.
3. Madden DJ. Four to ten milliseconds per year: age-related slowing of visual word identification. *J Gerontol: Psych Sci*, 1992;47:P59–P68.
4. Roenker DL, Cissell GM, Ball KK, Wadley VG, & Edwards JD. Speed-of-processing and driving simulator training result in improved driving performance. *Hum Factors*, 2003;45:218–233.
5. Mahncke HW, Bronstone A, & Merzenich MM. Brain plasticity and functional losses in the aged: scientific bases for a novel intervention. *Prog Brain Res*, 2006;157:81-109.
6. Greenwood PM. Functional plasticity in cognitive aging: review and hypothesis. *Neuropsychol*, 2007;21:657-673.
7. Hertzog C, Kramer AF, Wilson RS, & Lindenberger U. Enrichment effects on adult cognitive development: can the functional capacity of older adults be preserved and enhanced? *PsycholSci Pub Interest*, 2008;9:1-65.
8. Salthouse TA. Consequences of age-related cognitive declines. *Ann Rev Psychol*, 2012;63: in press.

- 1  
2  
3 9. Salthouse TA. When does age-related cognitive decline begin? *Neurobiol Aging*,  
4  
5 2009;30:507-514.  
6  
7
- 8 10. Clay OJ, Edwards JD, Ross LA, Okonkwo O, Wadley VG, Roth DL, & Ball KK.  
9  
10 Visual function and cognitive speed of processing mediate age-related decline in  
11  
12 memory span and fluid intelligence. *J Aging Health*, 2009;21:547-566.  
13  
14
- 15 11. Lemke U, & Zimprich D. Longitudinal changes in memory performance and  
16  
17 processing speed in old age. *Aging, Neuropsychol, Cog*, 2005;12:57-77.  
18  
19
- 20 12. Zimprich DM. Can longitudinal changes in processing speed explain longitudinal  
21  
22 changes in fluid intelligence? *Psychol Aging*, 2002;17:690-695.  
23  
24
- 25 13. Ball KK, Edwards JD, & Ross LA. The impact of speed of processing training on  
26  
27 cognitive and everyday functions. *J Gerontol: SocSci*, 2007;62B:19-31.  
28  
29
- 30 14. Ball KK, Beard BL, Roenker DL, Miller RL, & Griggs DS. Age and visual search:  
31  
32 expanding the useful field of view. *J Optic SocAmer*, 1988;5:2210-2219.  
33  
34
- 35 15. Jobe JB, Smith DM, Ball KK, Tennstedt SL, Marsiske M, Willis SL, Rebok GW,  
36  
37 Morris JN, Helmers KF, Leveck MD, & Kleinman K. ACTIVE: a cognitive  
38  
39 intervention trial to promote independence in older adults. *Controlled Clin Trials*,  
40  
41 2001;22:453-479.  
42  
43
- 44 16. Ball KK, Berch DB, Helmers KF, Jobe JB, Leveck MD, Marsiske M, Morris JN,  
45  
46 Rebok GW, Smith DM, Tennstedt SL, Unverzagt FW, & Willis SL. Effects of  
47  
48 cognitive training interventions with older adults: a randomized controlled trial.  
49  
50 *JAMA*, 2002;288:2271-2281.  
51  
52
- 53 17. Willis SL, Tennstedt SL, Marsiske M, Ball KK, Elias J, Mann-Koepke K, Morris JN,  
54  
55 Rebok GW, Unverzagt FW, Stoddard A, & Wright E. Long-term effects of  
56  
57  
58  
59  
60

- 1  
2  
3 cognitive training on everyday functional outcomes in older adults. *JAMA*,  
4 2006;296:2805-2814.  
5  
6  
7
- 8 18. Wolinsky FD, Mahncke HW, Kosinski M, Unverzagt FW, Smith DM, Jones R,  
9 Stoddard A, &Tennstedt SL. The ACTIVE cognitive training trial and predicted  
10 medical expenditures. *BMC Health Serv Res*, 2009;9:109:1-9.  
11  
12
- 13 19. Wolinsky FD, Unverzagt FW, Smith DM, Jones R, Wright E, &Tennstedt S. The  
14 effects of the ACTIVE cognitive training interventions on clinically relevant  
15 declines in health-related quality of life. *J Gerontol: SocSci*, 2006;61B:S281-  
16 S287.  
17  
18  
19  
20  
21  
22  
23
- 24 20. Wolinsky FD, Unverzagt FW, Smith DM, Jones R, Stoddard A, &Tennstedt S. The  
25 ACTIVE cognitive training trial and health-related quality of life: protection that  
26 lasts for five years. *J Gerontol: Med Sci*, 2006;61A:1324-1329.  
27  
28  
29  
30
- 31 21. Wolinsky FD, Vander Weg MW, Martin R, Unverzagt FW, Ball KK, Jones R,  
32 &Tennstedt SL. The effect of speed of processing training on depressive  
33 symptoms in ACTIVE. *J Gerontol: Med Sci*, 2009;64A:468-472.  
34  
35  
36  
37  
38
- 39 22. Wolinsky FD, Mahncke HW, Vander Weg MW, Martin R, Unverzagt FW, Ball KK,  
40 Jones R, &Tennstedt SL. The ACTIVE cognitive training interventions and the  
41 onset of and recovery from suspected clinical depression. *J Gerontol:*  
42 *PsycholSci*, 2009;64B:577-585.  
43  
44  
45  
46  
47
- 48 23. Wolinsky FD, Mahncke HW, Vander Weg MW, Martin R, Unverzagt FW, Ball KK,  
49 Jones R, &Tennstedt SL. Speed of processing training improves self-rated  
50 health in older adults: enduring effects observed in the multi-site ACTIVE study.  
51 *IntPsychogeriatr*, 2010;22:470-478.  
52  
53  
54  
55  
56  
57  
58  
59  
60

- 1  
2  
3  
4  
5  
6  
7  
8  
9  
10  
11  
12  
13  
14  
15  
16  
17  
18  
19  
20  
21  
22  
23  
24  
25  
26  
27  
28  
29  
30  
31  
32  
33  
34  
35  
36  
37  
38  
39  
40  
41  
42  
43  
44  
45  
46  
47  
48  
49  
50  
51  
52  
53  
54  
55  
56  
57  
58  
59  
60
24. Wolinsky FD, Vander Weg MW, Martin R, Unverzagt FW, Willis SL, Marsiske M, Rebok GW, Morris JN, Ball KK, & Tennstedt SL. Cognitive training improves internal locus of control among older adults. *J Gerontol: SocSci*, 2010;65B:470-478.
  25. Wolinsky FD, Vander Weg MW, Howren MB, Jones MP, Martin R, Luger TM, Duff K, Goerdt C, Wolfe S, & Dotson M. Protocol for a randomized controlled trial to improve cognitive functioning in older adults: the Iowa Healthy and Active Minds Study. *BMJ Open*, 2011-000218, in press.
  26. Pfeiffer EA. A short portable mental status questionnaire for the assessment of organic brain deficit in elderly patients. *J Am Geriatr Soc*. 1975;23:433-41.
  27. Edwards JD, Vance DE, Wadley VG, Cissel GM, Roenker DL, & Ball KK. Reliability and validity of Useful Field of View test scores as administered by personal computer. *J ClinExperNeuropsychol*, 2005;27:529–543.
  28. Smith A. *Symbol digit modality test*. Los Angeles, CA: Western Psychological Services, 1982.
  29. Reitan RM, & Wolfson, D. *The Halstead-Reitan neuropsychological test battery: therapy and clinical interpretation*. Tucson, AZ: Neuropsychological Press, 1985.
  30. Benton AL, Hamsher K, & Silvan AB. *Multilingual aphasia examination* (3rd Edition). Iowa City, IA: AJA Associates, 1994.
  31. Lewis R, & Rennick PM. *Manual for the repeatable cognitive-perceptual-motor battery*. Gross Point, MI: Axon, 1979.
  32. Golden CJ. *The Stroop color and word test*. Chicago, IL: Stoelting Company, 1978.

- 1  
2  
3 33. Blom G. *Statistical estimates and transformed beta-variables*. New York, NY:  
4  
5 Wiley, 1958  
6  
7  
8 34. Measley TM, Erickson S, Allison DB. Rank-based inverse normal transformations  
9  
10 are increasingly used, but are they merited? *Behav Genetics* 2009;39:580-585.  
11  
12 35. Kraja AT, Corbett J, Ping A, Lin RS, Jacobsen PA, Crosswhite M, Borecki IB,  
13  
14 Province MA. Rheumatoid arthritis, item response theory, Blom transformation,  
15  
16 and mixed models. *BMC Proceedings* 2007;1:S116.  
17  
18  
19 36. McHorney CA, Ware JE, &Raczek R. The MOS 36-Item Short-Form health survey  
20  
21 (SF-36): II. Psychometric and clinical tests of validity in measuring physical and  
22  
23 mental health constructs. *Med Care*, 1993;31:247-263.  
24  
25  
26 37. Fox J. *Applied regression analysis and generalized linear models, 2<sup>nd</sup> ed.*  
27  
28  
29 Newberry Park, CA: Sage, 2008.  
30  
31 38. Salthouse TA. The processing-speed theory of adult age differences in cognition.  
32  
33  
34 *Psychol Rev*, 1996;103:403-428.  
35  
36 39. Salthouse TA. The paradox of cognitive change. *J Clin Exper Neuropsychol*,  
37  
38  
39 2010;332:622-629.  
40  
41  
42  
43  
44  
45  
46  
47  
48  
49  
50  
51  
52  
53  
54  
55  
56  
57  
58  
59  
60

1  
2  
3  
4  
5  
6  
7  
8  
9  
10  
11  
12  
13  
14  
15  
16  
17  
18  
19  
20  
21  
22  
23  
24  
25  
26  
27  
28  
29  
30  
31  
32  
33  
34  
35  
36  
37  
38  
39  
40  
41  
42  
43  
44  
45  
46  
47  
48  
49  
50  
51  
52  
53  
54  
55  
56  
57  
58  
59  
60

For peer review only

Table 1. Means and Standard Deviations (in Parentheses) of Selected Participant Characteristics and the Five Secondary Outcome Neuropsychological Tests at Randomization by Training group Status, N = 681.

| Variable                                                       | Overall<br>N=681 | Road<br>Tour<br>On-Site<br>No<br>Boosters<br>N=154 | Road<br>Tour<br>On-Site<br>With<br>Boosters<br>N=148 | Attention<br>Control<br>On-Site<br>N=188 | Road<br>Tour At-<br>Home<br>N=191 | <i>p</i><br>value |
|----------------------------------------------------------------|------------------|----------------------------------------------------|------------------------------------------------------|------------------------------------------|-----------------------------------|-------------------|
| <i>Personal Characteristics</i>                                |                  |                                                    |                                                      |                                          |                                   |                   |
| Age (years)                                                    | 61.9<br>(8.2)    | 61.4<br>(8.1)                                      | 62.5<br>(8.2)                                        | 61.8<br>(8.7)                            | 61.9<br>(7.9)                     | 0.676             |
| Men (%)                                                        | 37.3<br>(0.5)    | 37.2<br>(0.5)                                      | 32.5<br>(0.5)                                        | 42.0<br>(0.5)                            | 36.7<br>(0.5)                     | 0.340             |
| Married (%)                                                    | 69.9<br>(0.5)    | 73.0<br>(0.5)                                      | 61.0<br>(0.5)                                        | 73.4<br>(0.4)                            | 71.2<br>(0.5)                     | 0.053             |
| Single (%)                                                     | 11.2<br>(0.3)    | 10.1<br>(0.3)                                      | 14.9<br>(0.4)                                        | 8.0<br>(0.3)                             | 12.0<br>(0.3)                     | 0.219             |
| Working (%)                                                    | 54.5<br>(0.5)    | 56.8<br>(0.5)                                      | 53.9<br>(0.5)                                        | 50.0<br>(0.5)                            | 57.6<br>(0.6)                     | 0.459             |
| Retired (%)                                                    | 35.5<br>(0.4)    | 35.1<br>(0.5)                                      | 36.4<br>(0.4)                                        | 34.2<br>(0.5)                            | 34.6<br>(0.3)                     | 0.982             |
| Income ≤ \$35K (%)                                             | 28.3<br>(0.5)    | 24.3<br>(0.4)                                      | 36.4<br>(0.5)                                        | 27.7<br>(0.5)                            | 25.7<br>(0.4)                     | 0.079             |
| Income ≥ \$75K (%)                                             | 46.6<br>(0.5)    | 45.3<br>(0.5)                                      | 41.6<br>(0.4)                                        | 47.3<br>(0.5)                            | 50.8<br>(0.5)                     | 0.383             |
| Self-Rated Health<br>(5=best 1=worst)                          | 3.8<br>(0.9)     | 3.8<br>(0.9)                                       | 3.8<br>(0.8)                                         | 3.7<br>(0.9)                             | 3.9<br>(0.8)                      | 0.526             |
| One-Year Change in<br>Self-Rated<br>Health(5=best 1<br>=worst) | 3.2<br>(0.8)     | 3.3<br>(0.8)                                       | 3.3<br>(0.8)                                         | 3.2<br>(0.8)                             | 3.3<br>(0.7)                      | 0.646             |
| <i>Training Time</i>                                           |                  |                                                    |                                                      |                                          |                                   |                   |
| Minutes of Training                                            | 469<br>(217)     | 450<br>(199)                                       | 488<br>(151)                                         | 535<br>(154)                             | 404<br>(295)                      | 0.001             |
| <i>Neuropsychological Tests</i>                                |                  |                                                    |                                                      |                                          |                                   |                   |
| SDMT (# correct)                                               | 50.5<br>(9.4)    | 51.8<br>(9.0)                                      | 50.5<br>(9.5)                                        | 48.7<br>(9.3)                            | 51.1<br>(9.6)                     | 0.015             |

Table 1.Continued.

| Variable                     | Overall<br>N=681 | Road<br>Tour<br>On-Site<br>No<br>Boosters<br>N=154 | Road<br>Tour<br>On-Site<br>With<br>Boosters<br>N=148 | Attention<br>Control<br>On-Site<br>N=188 | Road<br>Tour At-<br>Home<br>N=191 | <i>p</i><br>value |
|------------------------------|------------------|----------------------------------------------------|------------------------------------------------------|------------------------------------------|-----------------------------------|-------------------|
| Trails A (sec)               | 41.9<br>(13.3)   | 40.9<br>(10.9)                                     | 39.8<br>(12.3)                                       | 45.0<br>(16.3)                           | 41.2<br>(12.0)                    | 0.001             |
| Trails B (sec)               | 66.9<br>(27.2)   | 63.8<br>(30.8)                                     | 65.8<br>(23.9)                                       | 71.8<br>(30.3)                           | 65.2<br>(22.1)                    | 0.030             |
| COWAT Composite (#<br>words) | 42.0<br>(11.9)   | 42.4<br>(11.0)                                     | 41.9<br>(12.7)                                       | 40.5<br>(11.5)                           | 43.2<br>(12.4)                    | 0.153             |
| DVT Errors (#)               | 8.1<br>(8.2)     | 7.5<br>(9.6)                                       | 9.0<br>(7.7)                                         | 7.9<br>(7.6)                             | 8.0<br>(7.8)                      | 0.427             |
| DVT Time (sec)               | 377.0<br>(84.1)  | 369.0<br>(82.2)                                    | 374.8<br>(83.7)                                      | 387.9<br>(86.5)                          | 374.5<br>(83.1)                   | 0.190             |
| Stroop Word (#)              | 70.4<br>(13.1)   | 71.2<br>(13.6)                                     | 71.8<br>(13.5)                                       | 68.1<br>(12.8)                           | 71.1<br>(12.4)                    | 0.038             |
| Stroop Color (#)             | 97.8<br>(17.6)   | 100.3<br>(17.3)                                    | 96.5<br>(18.7)                                       | 95.3<br>(17.8)                           | 99.3<br>(16.5)                    | 0.032             |
| Stroop Color-Word (#)        | 38.1<br>(9.0)    | 38.7<br>(9.5)                                      | 38.0<br>(8.7)                                        | 37.1<br>(9.1)                            | 38.6<br>(8.9)                     | 0.337             |



Table 2. Means and Standard Deviations (in Parentheses) of the Three UFOV Subtests (Stimulus Identification, Divided Attention, and Selective Attention), the UFOV Composite, and the Blom Rank Transformed UFOV Composite at Randomization and at Post-Training.

| Variable                                   | Overall<br>N=681 | Road<br>Tour On-<br>Site No<br>Boosters<br>N=154 | Road<br>Tour On-<br>Site With<br>Boosters<br>N=148 | Attention<br>Control<br>On-Site<br>N=188 | Road<br>Tour At-<br>Home<br>N=191 | <i>p</i><br>value |
|--------------------------------------------|------------------|--------------------------------------------------|----------------------------------------------------|------------------------------------------|-----------------------------------|-------------------|
| <i>Randomization</i>                       |                  |                                                  |                                                    |                                          |                                   |                   |
| Stimulus<br>Identification                 | 21.5<br>(20.8)   | 19.6<br>(9.2)                                    | 22.7<br>(25.5)                                     | 24.4<br>(29.6)                           | 21.5<br>(20.8)                    | 0.057             |
| Divided Attention                          | 75.2<br>(89.8)   | 79.1<br>(98.9)                                   | 65.9<br>(70.2)                                     | 81.4<br>(94.6)                           | 73.4<br>(90.9)                    | 0.421             |
| Selective Attention                        | 203.3<br>(103.1) | 202.5<br>(106.3)                                 | 193.7<br>(94.7)                                    | 214.1<br>(108.5)                         | 200.7<br>(101.0)                  | 0.331             |
| UFOV Composite                             | 300.0<br>(181.6) | 301.2<br>(192.5)                                 | 282.7<br>(154.9)                                   | 319.9<br>(197.1)                         | 292.8<br>(175.3)                  | 0.277             |
| Blom Rank<br>Transformed UFOV<br>Composite | 0.0<br>(1.0)     | -0.0<br>(1.0)                                    | -0.1<br>(0.9)                                      | 0.1<br>(1.0)                             | -0.0<br>(1.0)                     | 0.395             |
| <i>Post-Training</i>                       |                  |                                                  |                                                    |                                          |                                   |                   |
|                                            | Overall<br>N=620 | Road<br>Tour On-<br>Site No<br>Boosters<br>N=138 | Road<br>Tour On-<br>Site With<br>Boosters<br>N=142 | Attention<br>Control<br>On-Site<br>N=176 | Road<br>Tour At-<br>Home<br>N=172 | <i>p</i><br>value |
| Stimulus<br>Identification                 | 18.5<br>(10.8)   | 17.7<br>(5.8)                                    | 17.3<br>(4.4)                                      | 20.8<br>(17.5)                           | 17.9<br>(7.8)                     | 0.011             |
| Divided Attention                          | 45.4<br>(66.9)   | 37.6<br>(50.3)                                   | 44.7<br>(64.0)                                     | 63.1<br>(89.9)                           | 34.3<br>(47.4)                    | 0.001             |
| Selective Attention                        | 157.5<br>(93.0)  | 135.1<br>(75.9)                                  | 149.1<br>(87.8)                                    | 201.6<br>(106.6)                         | 136.9<br>(79.0)                   | 0.001             |
| UFOV Composite                             | 221.6<br>(147.2) | 190.5<br>(114.0)                                 | 211.6<br>(137.6)                                   | 285.5<br>(182.4)                         | 189.1<br>(114.8)                  | 0.001             |
| Blom Rank<br>Transformed UFOV<br>Composite | 0.0<br>(0.8)     | -0.1<br>(0.7)                                    | -0.0<br>(0.9)                                      | 0.4<br>(0.8)                             | -0.2<br>(0.8)                     | 0.001             |

Table 3. Pooled and Age-Stratum Specific Multiple Linear Regression Results for Predicting the Blom Rank transformed Composite UFOV Score at 6-8 Weeks Post-Randomization.

|                                                          | Unstandardized<br>Regression<br>Coefficient<br><i>b</i> | <i>P</i><br>value | Lower<br>CI <sub>95%</sub> | Higher<br>CI <sub>95%</sub> |
|----------------------------------------------------------|---------------------------------------------------------|-------------------|----------------------------|-----------------------------|
| Pooled Analysis with Both Age Strata (N = 620)           |                                                         |                   |                            |                             |
| Intercept                                                | 0.415                                                   | 0.001             | 0.309                      | 0.520                       |
| <i>Any Road Tour</i> Training (N=444)                    | 0.558                                                   | 0.001             | -0.433                     | -0.683                      |
| Onsite Attention Control (N=176)                         | 0.000                                                   | ---               | ---                        | ---                         |
| Blom Rank Transformed UFOV at Randomization              | 0.643                                                   | 0.001             | 0.585                      | 0.700                       |
| <i>R</i> Squared                                         | 0.491                                                   | 0.001             |                            |                             |
| Separate Analysis in the $\geq 65$ Age Stratum (N = 209) |                                                         |                   |                            |                             |
| Intercept                                                | 0.518                                                   | 0.001             | 0.343                      | 0.694                       |
| <i>Any Road Tour</i> Training (N=154)                    | -0.479                                                  | 0.001             | -0.290                     | -0.668                      |
| Onsite Attention Control (N=55)                          | 0.000                                                   | ---               | ---                        | ---                         |
| Blom Rank Transformed UFOV at Randomization              | 0.650                                                   | 0.001             | 0.547                      | 0.754                       |
| <i>R</i> Squared                                         | 0.482                                                   | 0.001             |                            |                             |
| Separate Analysis in the 50-64 Age Stratum (N = 411)     |                                                         |                   |                            |                             |
| Intercept                                                | 0.352                                                   | 0.001             | 0.218                      | 0.486                       |
| <i>Any Road Tour</i> Training (N=292)                    | -0.626                                                  | 0.001             | -0.467                     | -0.785                      |
| Onsite Attention Control (N=119)                         | 0.000                                                   | ---               | ---                        | ---                         |
| Blom Rank Transformed UFOV at Randomization              | 0.556                                                   | 0.001             | 0.479                      | 0.634                       |
| <i>R</i> Squared                                         | 0.413                                                   | 0.001             |                            |                             |

Table 4. Pooled and Age-Stratum Specific Multiple Linear Regression Results for Predicting the Blom Rank transformed Composite UFOV Score at 6-8 Weeks Post-Randomization.

|                                                      | Unstandardized<br>Regression<br>Coefficient<br><i>b</i> | <i>P</i><br>value | Lower<br>CI <sub>95%</sub> | Higher<br>CI <sub>95%</sub> |
|------------------------------------------------------|---------------------------------------------------------|-------------------|----------------------------|-----------------------------|
| Pooled Analysis with Both Age Strata (N = 620)       |                                                         |                   |                            |                             |
| Intercept                                            | 0.415                                                   | 0.001             | 0.309                      | 0.520                       |
| <i>Road Tour</i> Onsite no Boosters (N=139)          | -0.457                                                  | 0.001             | -0.299                     | -0.616                      |
| <i>Road Tour</i> Onsite with Boosters (N=136)        | -0.585                                                  | 0.001             | -0.426                     | -0.745                      |
| Onsite Attention Control (N=174)                     | 0.000                                                   | ---               | ---                        | ---                         |
| <i>Road Tour</i> At Home (N=171)                     | -0.629                                                  | 0.001             | -0.469                     | -0.769                      |
| Blom Rank Transformed UFOV at Randomization          | 0.642                                                   | 0.001             | 0.585                      | 0.699                       |
| <i>R</i> Squared                                     | 0.495                                                   | 0.001             |                            |                             |
| Separate Analysis in the ≥ 65 Age Stratum (N = 209)  |                                                         |                   |                            |                             |
| Intercept                                            | 0.520                                                   | 0.001             | 0.343                      | 0.697                       |
| <i>Road Tour</i> Onsite no Boosters (N=47)           | -0.465                                                  | 0.001             | -0.226                     | -0.704                      |
| <i>Road Tour</i> Onsite with Boosters (N=46)         | -0.480                                                  | 0.001             | -0.240                     | -0.721                      |
| Onsite Attention Control (N=55)                      | 0.000                                                   | ---               | ---                        | ---                         |
| <i>Road Tour</i> At Home (N=61)                      | -0.490                                                  | 0.001             | -0.263                     | -0.718                      |
| Blom Rank Transformed UFOV at Randomization          | 0.648                                                   | 0.001             | 0.542                      | 0.697                       |
| <i>R</i> Squared                                     | 0.482                                                   | 0.001             |                            |                             |
| Separate Analysis in the 50-64 Age Stratum (N = 411) |                                                         |                   |                            |                             |
| Intercept                                            | 0.353                                                   | 0.001             | 0.219                      | 0.486                       |
| <i>Road Tour</i> Onsite no Boosters (N=92)           | -0.483                                                  | 0.001             | -0.280                     | -0.685                      |
| <i>Road Tour</i> Onsite with Boosters (N=90)         | -0.665                                                  | 0.001             | -0.462                     | -0.869                      |
| Onsite Attention Control (N=119)                     | 0.000                                                   | ---               | ---                        | ---                         |
| <i>Road Tour</i> At Home (N=110)                     | -0.711                                                  | 0.001             | -0.519                     | -0.903                      |
| Blom Rank Transformed UFOV at Randomization          | 0.560                                                   | 0.001             | 0.483                      | 0.638                       |
| <i>R</i> Squared                                     | 0.421                                                   | 0.001             |                            |                             |

Figure 1. IHAMS CONSORT Flow Diagram.

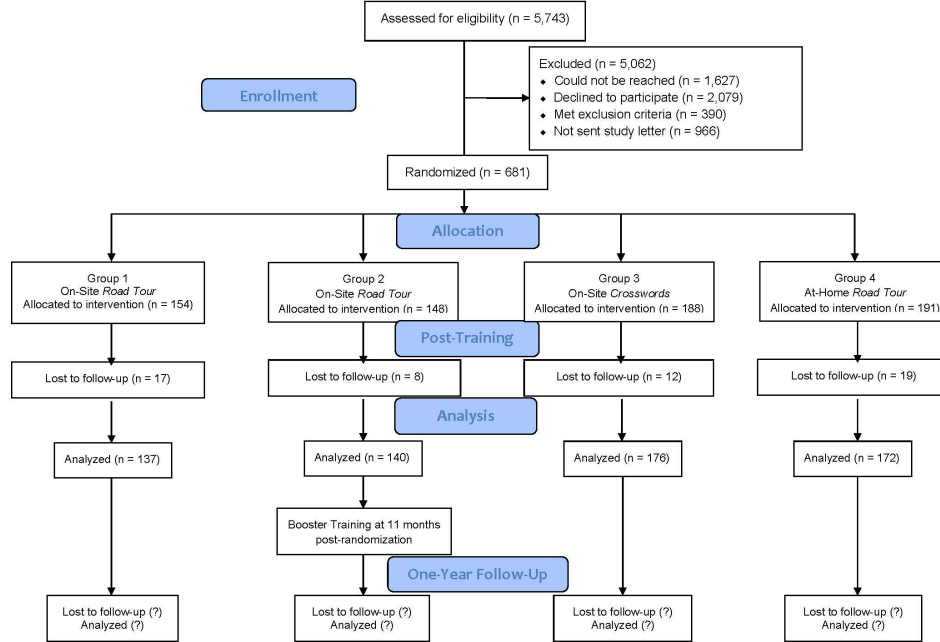

279x215mm (200 x 200 DPI)

1  
2  
3  
4  
5  
6  
7  
8  
9  
10  
11  
12  
13  
14  
15  
16  
17  
18  
19  
20  
21  
22  
23  
24  
25  
26  
27  
28  
29  
30  
31  
32  
33  
34  
35  
36  
37  
38  
39  
40  
41  
42  
43  
44  
45  
46  
47  
48  
49  
50  
51  
52  
53  
54  
55  
56  
57  
58  
59  
60

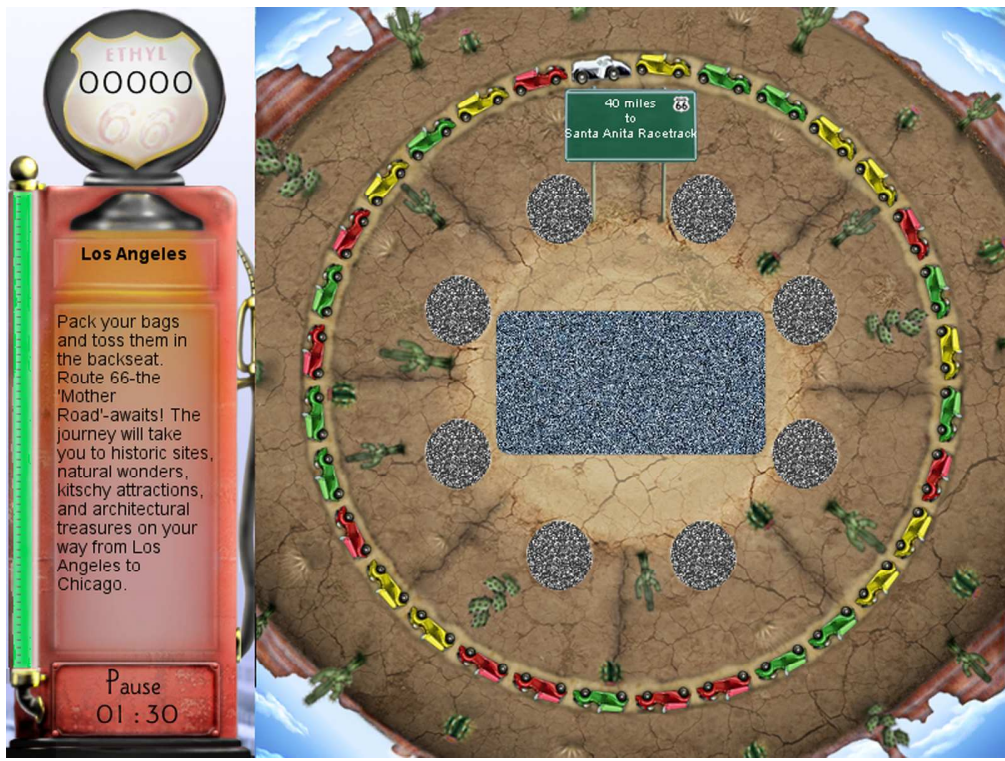

282x211mm (288 x 288 DPI)

Review only

1  
2  
3  
4  
5  
6  
7  
8  
9  
10  
11  
12  
13  
14  
15  
16  
17  
18  
19  
20  
21  
22  
23  
24  
25  
26  
27  
28  
29  
30  
31  
32  
33  
34  
35  
36  
37  
38  
39  
40  
41  
42  
43  
44  
45  
46  
47  
48  
49  
50  
51  
52  
53  
54  
55  
56  
57  
58  
59  
60

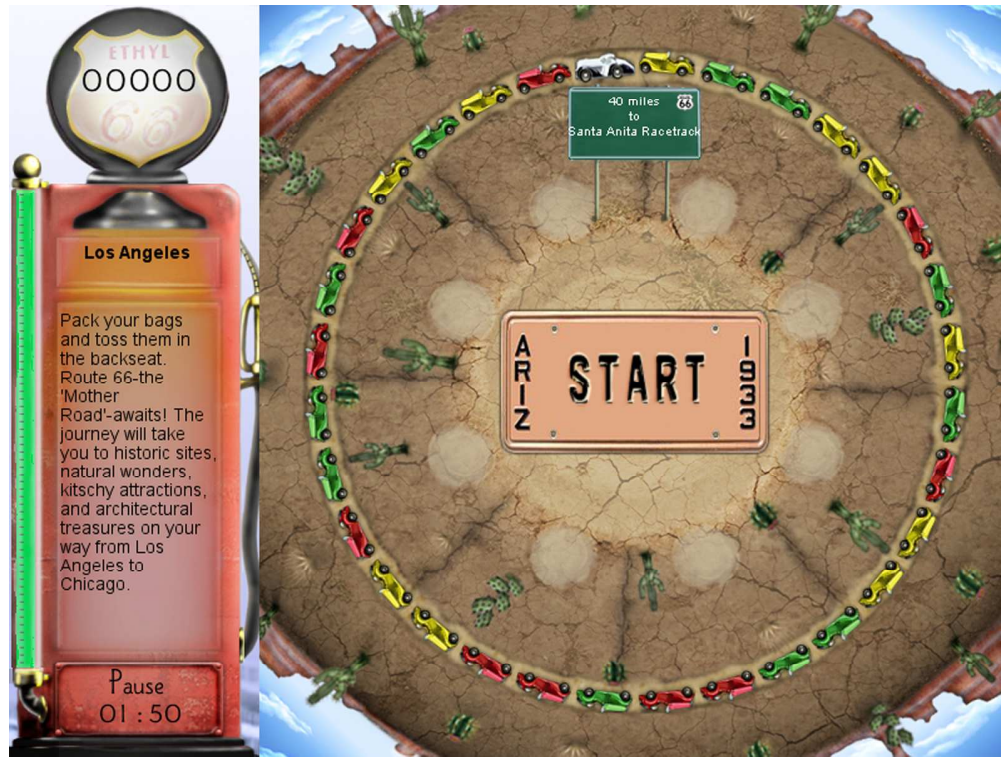

282x211mm (288 x 288 DPI)

Review only

1  
2  
3  
4  
5  
6  
7  
8  
9  
10  
11  
12  
13  
14  
15  
16  
17  
18  
19  
20  
21  
22  
23  
24  
25  
26  
27  
28  
29  
30  
31  
32  
33  
34  
35  
36  
37  
38  
39  
40  
41  
42  
43  
44  
45  
46  
47  
48  
49  
50  
51  
52  
53  
54  
55  
56  
57  
58  
59  
60

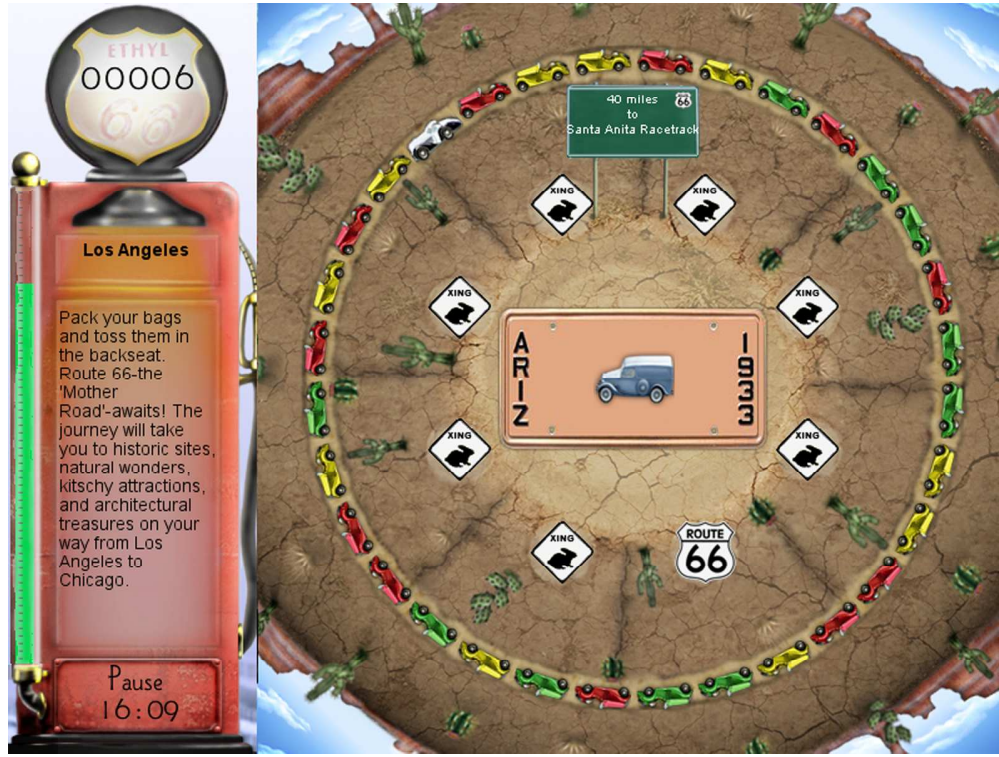

282x211mm (288 x 288 DPI)

Review only

1  
2  
3  
4  
5  
6  
7  
8  
9  
10  
11  
12  
13  
14  
15  
16  
17  
18  
19  
20  
21  
22  
23  
24  
25  
26  
27  
28  
29  
30  
31  
32  
33  
34  
35  
36  
37  
38  
39  
40  
41  
42  
43  
44  
45  
46  
47  
48  
49  
50  
51  
52  
53  
54  
55  
56  
57  
58  
59  
60

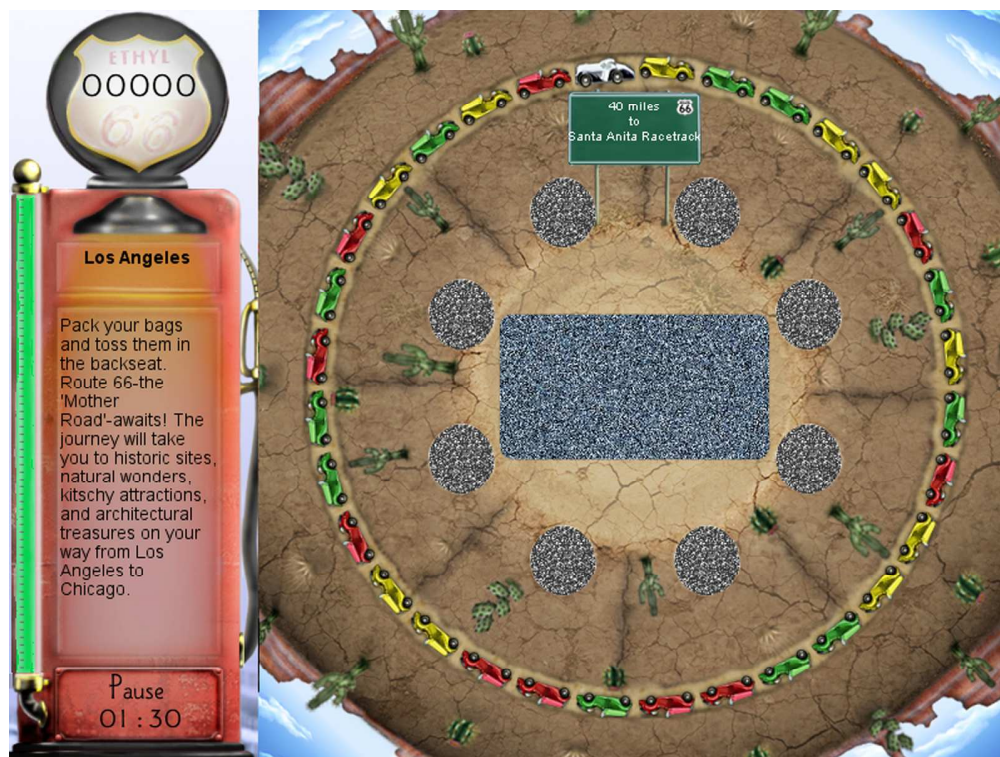

282x211mm (288 x 288 DPI)

Review only



1  
2  
3  
4  
5  
6  
7  
8  
9  
10  
11  
12  
13  
14  
15  
16  
17  
18  
19  
20  
21  
22  
23  
24  
25  
26  
27  
28  
29  
30  
31  
32  
33  
34  
35  
36  
37  
38  
39  
40  
41  
42  
43  
44  
45  
46  
47  
48  
49  
50  
51  
52  
53  
54  
55  
56  
57  
58  
59  
60

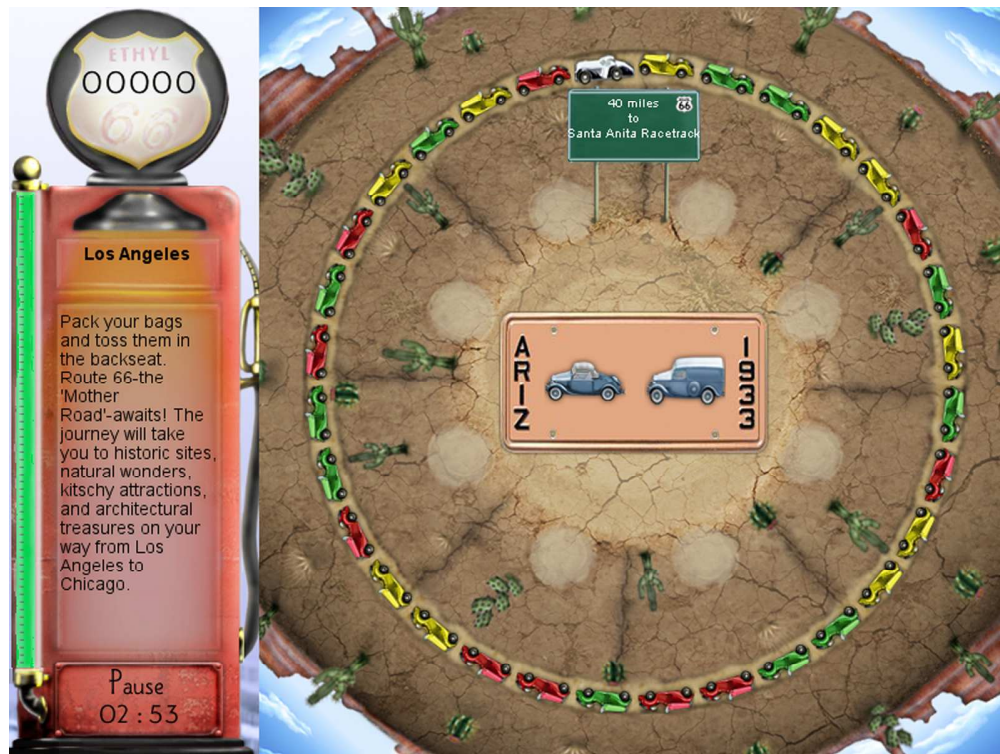

282x211mm (288 x 288 DPI)

Review only

1  
2  
3  
4  
5  
6  
7  
8  
9  
10  
11  
12  
13  
14  
15  
16  
17  
18  
19  
20  
21  
22  
23  
24  
25  
26  
27  
28  
29  
30  
31  
32  
33  
34  
35  
36  
37  
38  
39  
40  
41  
42  
43  
44  
45  
46  
47  
48  
49  
50  
51  
52  
53  
54  
55  
56  
57  
58  
59  
60

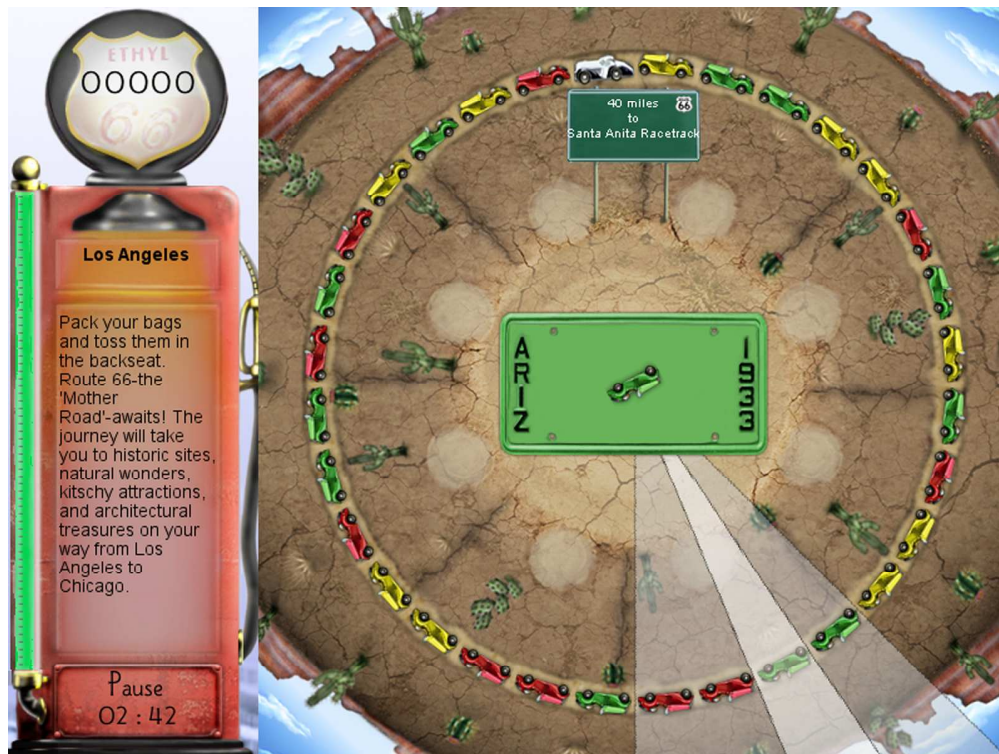

282x211mm (288 x 288 DPI)

Review only

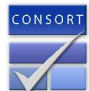

## CONSORT 2010 checklist of information to include when reporting a randomised trial\*

| Section/Topic                    | Item No | Checklist item                                                                                                                                                                              | Reported on page No |
|----------------------------------|---------|---------------------------------------------------------------------------------------------------------------------------------------------------------------------------------------------|---------------------|
| <b>Title and abstract</b>        |         |                                                                                                                                                                                             |                     |
|                                  | 1a      | Identification as a randomised trial in the title                                                                                                                                           | 1                   |
|                                  | 1b      | Structured summary of trial design, methods, results, and conclusions (for specific guidance see CONSORT for abstracts)                                                                     | 2-3                 |
| <b>Introduction</b>              |         |                                                                                                                                                                                             |                     |
| Background and objectives        | 2a      | Scientific background and explanation of rationale                                                                                                                                          | 5-7                 |
|                                  | 2b      | Specific objectives or hypotheses                                                                                                                                                           | 7                   |
| <b>Methods</b>                   |         |                                                                                                                                                                                             |                     |
| Trial design                     | 3a      | Description of trial design (such as parallel, factorial) including allocation ratio                                                                                                        | 6-7                 |
|                                  | 3b      | Important changes to methods after trial commencement (such as eligibility criteria), with reasons                                                                                          | na                  |
| Participants                     | 4a      | Eligibility criteria for participants                                                                                                                                                       | 8-9                 |
|                                  | 4b      | Settings and locations where the data were collected                                                                                                                                        | 8                   |
| Interventions                    | 5       | The interventions for each group with sufficient details to allow replication, including how and when they were actually administered                                                       | 7-8, 11-12          |
| Outcomes                         | 6a      | Completely defined pre-specified primary and secondary outcome measures, including how and when they were assessed                                                                          | 10-11               |
|                                  | 6b      | Any changes to trial outcomes after the trial commenced, with reasons                                                                                                                       | na                  |
| Sample size                      | 7a      | How sample size was determined                                                                                                                                                              | 9                   |
|                                  | 7b      | When applicable, explanation of any interim analyses and stopping guidelines                                                                                                                | na                  |
| <b>Randomisation:</b>            |         |                                                                                                                                                                                             |                     |
| Sequence generation              | 8a      | Method used to generate the random allocation sequence                                                                                                                                      | 9-10                |
|                                  | 8b      | Type of randomisation; details of any restriction (such as blocking and block size)                                                                                                         | 9-10                |
| Allocation concealment mechanism | 9       | Mechanism used to implement the random allocation sequence (such as sequentially numbered containers), describing any steps taken to conceal the sequence until interventions were assigned | 9-10                |
| Implementation                   | 10      | Who generated the random allocation sequence, who enrolled participants, and who assigned participants to interventions                                                                     | 9-10                |
| Blinding                         | 11a     | If done, who was blinded after assignment to interventions (for example, participants, care providers, those                                                                                | 9-10                |

|                                                      |     |                                                                                                                                                   |              |
|------------------------------------------------------|-----|---------------------------------------------------------------------------------------------------------------------------------------------------|--------------|
|                                                      |     | assessing outcomes) and how                                                                                                                       |              |
|                                                      | 11b | If relevant, description of the similarity of interventions                                                                                       | 7-8, 11-12   |
| Statistical methods                                  | 12a | Statistical methods used to compare groups for primary and secondary outcomes                                                                     | 12-13        |
|                                                      | 12b | Methods for additional analyses, such as subgroup analyses and adjusted analyses                                                                  | 12-13        |
| <b>Results</b>                                       |     |                                                                                                                                                   |              |
| Participant flow (a diagram is strongly recommended) | 13a | For each group, the numbers of participants who were randomly assigned, received intended treatment, and were analysed for the primary outcome    | 32           |
|                                                      | 13b | For each group, losses and exclusions after randomisation, together with reasons                                                                  | 32           |
| Recruitment                                          | 14a | Dates defining the periods of recruitment and follow-up                                                                                           | 9            |
|                                                      | 14b | Why the trial ended or was stopped                                                                                                                | na           |
| Baseline data                                        | 15  | A table showing baseline demographic and clinical characteristics for each group                                                                  | 34-35        |
| Numbers analysed                                     | 16  | For each group, number of participants (denominator) included in each analysis and whether the analysis was by original assigned groups           | 32           |
| Outcomes and estimation                              | 17a | For each primary and secondary outcome, results for each group, and the estimated effect size and its precision (such as 95% confidence interval) | 15-18, 37-38 |
|                                                      | 17b | For binary outcomes, presentation of both absolute and relative effect sizes is recommended                                                       | 15-18, 37-38 |
| Ancillary analyses                                   | 18  | Results of any other analyses performed, including subgroup analyses and adjusted analyses, distinguishing pre-specified from exploratory         | 14-15        |
| Harms                                                | 19  | All important harms or unintended effects in each group (for specific guidance see CONSORT for harms)                                             | na           |
| <b>Discussion</b>                                    |     |                                                                                                                                                   |              |
| Limitations                                          | 20  | Trial limitations, addressing sources of potential bias, imprecision, and, if relevant, multiplicity of analyses                                  | 23           |
| Generalisability                                     | 21  | Generalisability (external validity, applicability) of the trial findings                                                                         | 23           |
| Interpretation                                       | 22  | Interpretation consistent with results, balancing benefits and harms, and considering other relevant evidence                                     | 19-22        |
| <b>Other information</b>                             |     |                                                                                                                                                   |              |
| Registration                                         | 23  | Registration number and name of trial registry                                                                                                    | 3            |
| Protocol                                             | 24  | Where the full trial protocol can be accessed, if available                                                                                       | 7, ref. 25   |
| Funding                                              | 25  | Sources of funding and other support (such as supply of drugs), role of funders                                                                   | 24           |

\*We strongly recommend reading this statement in conjunction with the CONSORT 2010 Explanation and Elaboration for important clarifications on all the items. If relevant, we also recommend reading CONSORT extensions for cluster randomised trials, non-inferiority and equivalence trials, non-pharmacological treatments, herbal interventions, and pragmatic trials. Additional extensions are forthcoming: for those and for up to date references relevant to this checklist, see [www.consort-statement.org](http://www.consort-statement.org).
